# 1 Structure of SWI/SNF chromatin remodeller RSC 2 bound to a nucleosome

3  
4 Felix R. Wagner<sup>1</sup>, Christian Dienemann<sup>1</sup>, Haibo Wang<sup>1</sup>, Alexandra Stützer<sup>2,3</sup>, Dmitry  
5 Tegunov<sup>1</sup>, Henning Urlaub<sup>2,3</sup>, Patrick Cramer<sup>1\*</sup>

6  
7 <sup>1</sup>Department of Molecular Biology, Max Planck Institute for Biophysical Chemistry, Am  
8 Fassberg 11, 37077 Göttingen, Germany. <sup>2</sup>Max Planck Institute for Biophysical Chemistry,  
9 Bioanalytical Mass Spectrometry, Am Fassberg 11, 37077 Göttingen, Germany. <sup>3</sup>University  
10 Medical Center Göttingen, Institute of Clinical Chemistry, Bioanalytics Group, Göttingen,  
11 Germany. \*Email: [patrick.cramer@mpibpc.mpg.de](mailto:patrick.cramer@mpibpc.mpg.de)

## 12 Abstract

13 **Chromatin remodelling complexes of the SWI/SNF family function in the formation of**  
14 **nucleosome-depleted regions and transcriptionally active promoters in the eukaryote**  
15 **genome. The structure of the *Saccharomyces cerevisiae* SWI/SNF family member RSC in**  
16 **complex with a nucleosome substrate reveals five protein modules and suggests key**  
17 **features of the remodelling mechanism. A DNA-interacting module grasps extra-**  
18 **nucleosomal DNA and helps to recruit RSC to promoters. The ATPase and arm modules**  
19 **sandwich the nucleosome disc with their ‘SnAC’ and ‘finger’ elements, respectively. The**  
20 **translocase motor engages with the edge of the nucleosome at superhelical location +2 to**  
21 **pump DNA along the nucleosome, resulting in a sliding of the histone octamer along DNA.**  
22 **The results elucidate how nucleosome-depleted regions are formed and provide a basis**  
23 **for understanding human chromatin remodelling complexes of the SWI/SNF family and**  
24 **the consequences of cancer mutations that frequently occur in these complexes.**  
25

26  
27 Nucleosomes that occupy gene promoters inhibit transcription initiation by RNA polymerase II  
28 and must be evicted or slid along DNA to establish nucleosome-depleted regions (NDRs) and  
29 to create active promoters<sup>1</sup>. Nucleosomes are evicted or slid by chromatin remodelling  
30 complexes that hydrolyse adenosine triphosphate (ATP)<sup>2</sup>. Remodelling complexes of the  
31 SWI/SNF family are of particular importance for NDR formation and transcription, and  
32 mutations in these complexes are linked to human cancers<sup>3,4</sup>. The yeast *Saccharomyces*  
33 *cerevisiae* contains two complexes of this family, the SWI/SNF complex<sup>5,6</sup>, and the essential  
34 and abundant 16-subunit complex RSC (‘Remodels the Structure of Chromatin’)<sup>7</sup>.

35 RSC contains the ATPase subunit Sth1 that functions as a DNA translocase<sup>8-10</sup> and is  
36 required for normal transcription activity<sup>11</sup>. RSC can remove nucleosomes from promoters in  
37 reconstitution assays *in vitro*<sup>12</sup>. *In vivo*, RSC localizes to promoter regions<sup>13</sup>, and its loss leads  
38 to reoccupation of NDRs with nucleosomes<sup>14</sup>. RSC can bind and position the specialized +1  
39 and -1 nucleosomes<sup>15-17</sup> that flank NDRs on the downstream and upstream side, respectively<sup>1,4</sup>.  
40 RSC can recognize poly(A) and GC-rich elements in promoter DNA<sup>16,18,19</sup>. The arrangement  
41 of these elements determines the strength and directionality of RSC action on promoter  
42 nucleosomes<sup>20</sup>.

43 Understanding how promoter nucleosomes are remodelled and how NDRs are  
44 established requires structural studies of RSC and its functional complexes. Electron  
45 microscopy (EM) studies of RSC showed a flexible structure with a central cavity that was  
46 suggested to bind a nucleosome<sup>21-23</sup>. However, these studies were limited to low resolution,  
47 which prevented molecular-mechanistic insights. Here we present the cryo-EM structure of  
48 RSC engaged with a nucleosome substrate. The results reveal the intricate subunit architecture  
49 of RSC, show how RSC engages with the nucleosome and adjacent DNA, and elucidate  
50 substrate recognition and remodelling mechanisms.

51

## 52 **Structure of RSC-nucleosome complex**

53 Endogenous RSC was isolated from the yeast *Saccharomyces cerevisiae* via affinity  
54 purification of the tagged subunit Rsc2 (**Extended Data Fig. 1a**) (Methods). A RSC-  
55 nucleosome complex was assembled with DNA overhangs on each end of the nucleosome in  
56 the presence of the ATPase transition state analogue ADP-BeF<sub>3</sub> (**Extended Data Fig. 1b**).  
57 Cryo-EM analysis resulted in a medium-resolution reconstruction that revealed the  
58 nucleosome, four turns of DNA exiting from one side of the nucleosome, and five RSC modules  
59 that we refer to as ATPase, ARP, body, arm, and DNA-interaction module (DIM) (**Figure 1a**;  
60 **Extended Data Fig. 2**). Focussed 3D classification enabled modelling of the nucleosome and  
61 associated ATPase with the use of a related structure<sup>24</sup>, and placement of an adapted ARP  
62 module structure<sup>25</sup> (**Extended Data Fig. 2**). We also subjected the free RSC complex to cryo-  
63 EM analysis, and resolved the body and arm modules at resolutions of 3.6 Å and 3.8 Å,  
64 respectively (**Extended Data Figs. 3, 4a-c**). This led to a structural model of the RSC-  
65 nucleosome complex that only lacks the DIM module and agrees with lysine-lysine crosslinking  
66 information (**Extended Data Fig. 1c, d**).

67 The structure reveals the intricate architecture of RSC (**Figure 1, Supplementary**  
68 **Video 1**). The body module contains subunits Rsc4, Rsc6, Rsc8, Rsc9, Rsc58, Htt1, and the N-  
69 terminal region of Sth1 (**Figure 2, Extended Data Table 1**). The ARP module is flexibly  
70 tethered to the body and comprises the helicase-SANT associated (HSA) region of Sth1, the  
71 actin-related proteins Arp7 and Arp9, and subunit Rtt102. The C-terminal region of Sth1  
72 extends from the HSA region and forms the ATPase module (**Extended Data Fig. 5a**). The  
73 arm module protrudes from the body and contains subunit Sfh1 and parts of Rsc8, Npl6, and  
74 Rsc9 (**Figure 2**). The arm and body modules are tightly connected by two copies of Rsc8 that  
75 adopt different structures (**Extended Data Fig. 5b**). The N-terminal SWIRM domains of Rsc8  
76 reside in the arm, whereas the SANT domains and one of the ZZ zinc finger domains reside in  
77 the body, as do the long C-terminal helices. The RSC structure and observed subunit  
78 interactions explain the requirement of the Rsc4 C-terminal region for cell growth<sup>26</sup>, the known  
79 interaction between Rsc6 and Rsc8<sup>27</sup>, and lethal effects of Rsc58 truncation<sup>28</sup>.

80 RSC also contains six domains that are implicated in interactions with histone tails. The  
81 N-terminal bromodomain in Rsc58 locates to the surface of the body (**Extended Data Fig. 5c**).  
82 The five other domains are mobile, and include a bromodomain in Sth1, two bromodomains in  
83 Rsc2, a BAH domain in Rsc2 that binds histone H3<sup>29</sup>, and a tandem bromodomain in Rsc4 that  
84 interacts with acetylated H3 tails<sup>26</sup>, in particular acetylated lysine K14<sup>26,30</sup>. RSC also contains  
85 five putative DNA-binding domains, of which four are mobile. These include the zinc finger  
86 domains in subunits Rsc3 and Rsc30, an RFX domain in subunit Rsc9, and a ZZ finger domain  
87 in one of the two Rsc8 subunits. In summary, RSC consists of five modules and nine flexibly

88 connected domains, of which some are suggested to be involved in substrate selection via the  
89 recognition of histone modifications and DNA sequence features.

90

### 91 **ATPase binding and translocation**

92 RSC engages in multivalent interactions with its substrate, contacting both DNA and histones  
93 (**Figure 1**). The ATPase and arm modules interact with the nucleosome, whereas the DIM  
94 module engages with DNA exiting from the nucleosome. The ATPase module binds the edge  
95 of the nucleosome, contacting both DNA gyres in a conformation poised for translocation  
96 activity (**Figure 3a**). The two lobes of the ATPase motor domain contact one gyre at  
97 superhelical location (SHL) +2 and adopt the same relative orientation as in the structure of the  
98 related SWI/SNF ATPase Snf2 bound to a nucleosome<sup>24</sup>. The N-terminal ATPase lobe 1 also  
99 binds the second DNA gyre around SHL -6 (**Figure 3b**), a location where the N-terminal tail  
100 of histone H3 is expected to protrude (**Extended Data Figure 4d**). Considering the known  
101 directionality of the translocase<sup>31</sup>, we arrive at the model that the RSC ATPase motor pumps  
102 DNA towards the nucleosome dyad and along the octamer surface in the exit direction, which  
103 corresponds to the upstream direction of transcription, thus liberating more promoter DNA.

104 The ARP module couples RSC ATPase activity to DNA translocation and regulates the  
105 remodelling activity<sup>9,25,32</sup>. Our results suggest that this regulation involves changes in the  
106 position of the mobile ARP module that influence the conformation and mobility of the ATPase  
107 lobe 1 and its interactions with both DNA gyres (**Figure 3b**). These changes are likely  
108 transmitted through the hinge region between the HSA region and lobe 1 that includes the ‘post-  
109 HSA’ region of Sth1. Mutations of the post-HSA region increase ATPase activity and DNA  
110 translocation, suggesting that the hinge acts as a throttle for the ATPase<sup>8-10</sup>. The ARP module  
111 adopts a defined position in the RSC-nucleosome complex, but it is mobile in the free RSC  
112 structure. Based on these results, we propose that the position of the mobile ARP module can  
113 influence the conformation and motility of the bilobal ATPase motor and thereby control the  
114 translocation activity of RSC (**Figure 3b**).

115

### 116 **Nucleosome sandwiching and sliding**

117 The structure also suggests a model for how RSC can slide nucleosomes along DNA. RSC  
118 contacts the nucleosome disc not only at the edge, but also binds both of its faces. The SnAC  
119 domain in subunit Sth1 binds the outer face of the histone octamer, whereas the arm module  
120 binds the inner face (**Figure 4a**). Sandwiching interactions would retain the histone octamer  
121 and enable the ATPase motor to pump DNA around it, effectively sliding the octamer  
122 downstream on DNA. Consistent with this model, the SnAC domain in the SWI/SNF  
123 homologue Snf2 is important for remodelling *in vivo* and biochemical data suggested that it  
124 acts as a histone anchor that is required for nucleosome sliding<sup>33</sup>. The strength of the SnAC-  
125 histone octamer contact may be influenced by the N-terminal tail of histone H4, which binds at  
126 the interface of the SnAC and ATPase motor of Sth1 (**Figure 4a**). Since histone acetylation can  
127 impair octamer transfer by RSC to the histone chaperone Nap1<sup>34</sup>, this leads to the intriguing  
128 model that histone acetylation may strengthen the sandwiching contacts, thereby impairing  
129 octamer eviction and favouring nucleosome sliding.

130 Binding of the arm module to the inner face of the histone octamer is mediated by an  
131 exposed ‘finger’ helix, which resides in the C-terminal region of subunit Sth1 that is required  
132 for normal cell growth<sup>35</sup> (**Figure 4a, Extended Data Figs. 1d, 4e**). The finger helix contains

133 four arginine residues (R397, R400, R401 and R404) that contact the acidic patch of the  
134 octamer. Three of these arginines are known to be mutated in human cancers (**Figure 4b**),  
135 pointing to the functional significance of the finger helix-acidic patch interaction. The finger  
136 helix and its arginine residues are highly conserved in Sfh1 homologs throughout eukaryotes  
137 (**Figure 4c**). The SnAC domain is also conserved over species and between SWI/SNF  
138 complexes<sup>36</sup>, suggesting that the sandwiching mechanism of nucleosome sliding is used by all  
139 SWI/SNF family complexes.

140 The arm module and its finger helix may also contribute to substrate selection. RSC  
141 preferentially recognizes nucleosomes that contain the histone variant H2A.Z<sup>37</sup>. Such  
142 nucleosomes show a more extended acidic patch<sup>38</sup> and may have increased affinity for the basic  
143 RSC finger. The arm module may also contact the C-terminal tail of H2A.Z (**Extended Data**  
144 **Fig. 4d**) that differs in ten amino acid residues from the tail of H2A in yeast. The observed arm-  
145 octamer interaction also explains why ubiquitination of histone H2B counteracts RSC  
146 function<sup>39</sup>. The ubiquitin moiety attached to H2B residue K123 (human K120) is predicted to  
147 sterically interfere with the arm-octamer interaction (**Extended Data Fig. 4f**).

148

#### 149 **DNA recognition and NDR formation**

150 RSC not only binds the nucleosome, but also DNA that exits from it (**Figure 5a**). The DIM  
151 module contacts exiting DNA ~20 – 40 bp upstream of SHL –7 of the nucleosome. This is in  
152 agreement with RSC protecting ~50 bp of extra-nucleosomal DNA from nuclease digestion<sup>15</sup>.  
153 The DIM-DNA contact also explains how RSC recognizes specific DNA elements that are  
154 enriched in promoters<sup>16,18-20</sup>. Consistent with crosslinking information, the RSC subunits Rsc2,  
155 Rsc3 and Rsc30 are located in the DIM (**Extended Data Fig. 1d**). Rsc3 and Rsc30 are known  
156 to interact<sup>40</sup> and recognize a CGCG DNA element located upstream of the transcription start  
157 site<sup>18</sup>. They may bind DNA via their N-terminal zinc cluster domains<sup>18,40</sup>. It remains to be seen  
158 to what extent promoter targeting by RSC depends on its binding to DNA sequence, histone  
159 modifications, and the presence of histone variant H2A.Z.

160 The results also elucidate the formation of NDRs. In *S. cerevisiae*, the DNA linker  
161 length between two nucleosomes is only ~23 bp on average<sup>41</sup>. Steric considerations predict that  
162 RSC can enter chromatin only at sites where the length of the DNA linking two nucleosomes  
163 is at least 40 – 50 bp (**Figure 5b**). This can explain why RSC is targeted only to promoter  
164 regions, which are intrinsically nucleosome-depleted to some extent. NDR formation involves  
165 sliding of both flanking nucleosomes away from the NDR center<sup>12</sup>. Here we have interpreted  
166 the RSC-nucleosome structure to describe RSC action on the +1 nucleosome, but the structure  
167 can equally describe RSC action on the –1 nucleosome. In the latter case, DNA exits in  
168 downstream direction, rather than upstream, the ATPase engages with SHL –2, rather than SHL  
169 +2, and DNA translocation slides the nucleosome upstream, rather than downstream. Provided  
170 that RSC remains bound to both flanking nucleosomes after remodelling, a minimum NDR size  
171 of ~100 bp would result (**Figure 5b**). However, larger NDRs can be formed when RSC evicts  
172 a nucleosome<sup>16</sup>.

173

#### 174 **SWI/SNF family and cancer**

175 The PBAF complex is the human counterpart of RSC and contains subunits homologous to  
176 Sth1, Rsc6, the Rsc8 dimer, Sfh1, Arp7 and Arp9 (**Extended Data Table 1**). In addition, the  
177 PBAF subunit BAF200<sup>42</sup> contains an armadillo repeat fold<sup>43</sup> and likely corresponds to Rsc9.

178 Further, the BAF180 subunit comprises regions that resemble Rsc2 and Rsc4<sup>44</sup>. Only the small  
179 RSC subunits Rsc58, Rtt102 and Htl1 lack obvious counterparts. Therefore, the yeast RSC  
180 structure is a good model for human PBAF. Projection of the homologous regions onto the RSC  
181 structure reveals that the ATPase, ARP and arm modules are well conserved in PBAF, and that  
182 the body is at least partially conserved (**Figure 6a**). The DIM differs substantially in PBAF  
183 because human counterparts of subunits Rsc3 and Rsc30 are not known. However, PBAF  
184 subunits contain 12 putative DNA-binding domains that may mediate DNA recognition  
185 (**Extended Data Table 1**).

186 The RSC structure also suggests the architecture of the related yeast SWI/SNF complex  
187 and its human counterpart BAF. Based on subunit composition and sequence homologies  
188 (**Extended Data Figure 6**), the yeast SWI/SNF complex contains RSC-related ATPase, ARP,  
189 and arm modules, whereas its body module is apparently smaller. The human BAF complex  
190 contains counterparts of RSC subunits Sth1, Sfh1, Arp7, Arp9, Rsc6, and Rsc8. The BAF  
191 subunit BAF250a is predicted to contain five armadillo repeats<sup>45</sup>, and is likely the counterpart  
192 of Rsc9. Thus, BAF also contains the ATPase, ARP and arm modules, and a body module that  
193 is at least partially conserved.

194 Due to these homologies, the RSC structure can be used to locate protein sites in PBAF  
195 that are known to be mutated in human cancers. This analysis shows that cancer-associated  
196 mutations are scattered throughout the remodelling complex (**Figure 6a**). Most mapped  
197 mutations are located inside the structured modules and are predicted to destabilize protein  
198 folds. However, mutations are particularly enriched within the ATPase, ARP and arm modules  
199 that surround and contact the nucleosome, suggesting that they cause functional defects.

200

### 201 **Diversity in chromatin remodellers**

202 Finally, we compared the RSC-nucleosome structure with nucleosome complex structures of  
203 the three other families of chromatin remodelling factors (**Figure 6b**). Whereas RSC is a good  
204 model for the SWI/SNF family, factors of the ISWI, CHD and INO80 families are clearly  
205 distinct. With respect to the ISWI family, the ATPase motor binds SHL +2<sup>46</sup>, but other  
206 interactions have not been structurally resolved. With respect to the CHD family, the ATPase  
207 motor of yeast Chd1 also binds SHL +2, but its DNA-binding region engages with exiting DNA  
208 in close proximity to the nucleosome, leading to a different trajectory of exit DNA<sup>47,48</sup>.

209 With regard to the INO80 family, the ATPase motor of the SWR1 complex also binds  
210 SHL +2<sup>49</sup>, whereas the ATPase of the INO80 complex binds SHL -6<sup>50,51</sup>. INO80 also contains  
211 an ARP module<sup>52</sup>, which however contacts exit DNA in a manner that is distinct from the DIM-  
212 DNA contacts observed for RSC. The INO80 complex also contains flexible protein extensions,  
213 called the ‘Arp5 grappler’ and the ‘Ies RAR’, which can contact both faces of the histone  
214 octamer<sup>51</sup>, but these contacts differ substantially from the sandwiching interactions formed by  
215 RSC. In conclusion, the RSC-nucleosome structure provides mechanistic insights into the  
216 fourth family of chromatin remodelling complexes, and provides a basis for investigating the  
217 targeting, regulation, and cellular roles of SWI/SNF family complexes.

218

219

### 220 **Acknowledgements**

221 We thank current and former members of the Cramer Laboratory, including S. Osman, G.  
222 Kokic, P. Seweryn, S. Schilbach, S. Neyer, and H. Hillen. F.R.W. was supported by a

## Wagner et al., RSC-nucleosome complex structure

223 Boehringer Ingelheim Fonds PhD fellowship. H.U. was supported by the Deutsche  
224 Forschungsgemeinschaft (SFB860). P.C. was supported by the Deutsche  
225 Forschungsgemeinschaft (SFB860, SPP1935, EXC 2067/1-390729940), the European  
226 Research Council Advanced Investigator Grant TRANSREGULON (grant agreement No  
227 693023), and the Volkswagen Foundation.

228

### 229 **Author contributions**

230 F.R.W. carried out all experiments and data analysis unless stated otherwise. C.D. assisted with  
231 data collection and model building. A.S. and H.U. carried out crosslinking and mass  
232 spectrometry analysis. H.W. helped with nucleosome biochemistry. D.T. helped with cryo-EM  
233 data processing. P.C. designed and supervised the project. F.W. and P.C. wrote the manuscript,  
234 with input from all authors.

235

236 **Author information** The author declare that they have no competing financial interest.  
237 Correspondence and request of materials should be addressed to P.C.  
238 ([patrick.cramer@mpibpc.mpg.de](mailto:patrick.cramer@mpibpc.mpg.de)).

239

### 240 **Competing interests**

241 The authors declare no competing interests.

242

## 243 **REFERENCES**

- 244 1 Lorch, Y. & Kornberg, R. D. Chromatin-remodeling for transcription. *Q Rev Biophys* **50**,  
245 e5, doi:10.1017/S003358351700004X (2017).
- 246 2 Clapier, C. R., Iwasa, J., Cairns, B. R. & Peterson, C. L. Mechanisms of action and  
247 regulation of ATP-dependent chromatin-remodelling complexes. *Nat Rev Mol Cell Biol*  
248 **18**, 407-422, doi:10.1038/nrm.2017.26 (2017).
- 249 3 Pulice, J. L. & Kadoch, C. Composition and Function of Mammalian SWI/SNF Chromatin  
250 Remodeling Complexes in Human Disease. *Cold Spring Harb Symp Quant Biol* **81**, 53-  
251 60, doi:10.1101/sqb.2016.81.031021 (2016).
- 252 4 Henikoff, S. Mechanisms of Nucleosome Dynamics In Vivo. *Cold Spring Harb Perspect*  
253 *Med* **6**, doi:10.1101/cshperspect.a026666 (2016).
- 254 5 Hirschhorn, J. N., Brown, S. A., Clark, C. D. & Winston, F. Evidence that SNF2/SWI2 and  
255 SNF5 activate transcription in yeast by altering chromatin structure. *Genes Dev* **6**,  
256 2288-2298, doi:10.1101/gad.6.12a.2288 (1992).
- 257 6 Peterson, C. L. & Herskowitz, I. Characterization of the yeast SWI1, SWI2, and SWI3  
258 genes, which encode a global activator of transcription. *Cell* **68**, 573-583,  
259 doi:10.1016/0092-8674(92)90192-f (1992).
- 260 7 Cairns, B. R. *et al.* RSC, an essential, abundant chromatin-remodeling complex. *Cell* **87**,  
261 1249-1260, doi:10.1016/s0092-8674(00)81820-6 (1996).
- 262 8 Saha, A., Wittmeyer, J. & Cairns, B. R. Chromatin remodeling by RSC involves ATP-  
263 dependent DNA translocation. *Genes Dev* **16**, 2120-2134, doi:10.1101/gad.995002  
264 (2002).
- 265 9 Clapier, C. R. *et al.* Regulation of DNA Translocation Efficiency within the Chromatin  
266 Remodeler RSC/Sth1 Potentiates Nucleosome Sliding and Ejection. *Mol Cell* **62**, 453-  
267 461, doi:10.1016/j.molcel.2016.03.032 (2016).

Wagner et al., RSC-nucleosome complex structure

- 268 10 Szerlong, H. *et al.* The HSA domain binds nuclear actin-related proteins to regulate  
269 chromatin-remodeling ATPases. *Nat Struct Mol Biol* **15**, 469-476,  
270 doi:10.1038/nsmb.1403 (2008).
- 271 11 Parnell, T. J., Huff, J. T. & Cairns, B. R. RSC regulates nucleosome positioning at Pol II  
272 genes and density at Pol III genes. *EMBO J* **27**, 100-110, doi:10.1038/sj.emboj.7601946  
273 (2008).
- 274 12 Krietenstein, N. *et al.* Genomic Nucleosome Organization Reconstituted with Pure  
275 Proteins. *Cell* **167**, 709-721 e712, doi:10.1016/j.cell.2016.09.045 (2016).
- 276 13 Ng, H. H., Robert, F., Young, R. A. & Struhl, K. Genome-wide location and regulated  
277 recruitment of the RSC nucleosome-remodeling complex. *Genes Dev* **16**, 806-819,  
278 doi:10.1101/gad.978902 (2002).
- 279 14 Klein-Brill, A., Joseph-Strauss, D., Appleboim, A. & Friedman, N. Dynamics of Chromatin  
280 and Transcription during Transient Depletion of the RSC Chromatin Remodeling  
281 Complex. *Cell Rep* **26**, 279-292 e275, doi:10.1016/j.celrep.2018.12.020 (2019).
- 282 15 Brahma, S. & Henikoff, S. RSC-Associated Subnucleosomes Define MNase-Sensitive  
283 Promoters in Yeast. *Mol Cell* **73**, 238-249 e233, doi:10.1016/j.molcel.2018.10.046  
284 (2019).
- 285 16 Kubik, S. *et al.* Nucleosome Stability Distinguishes Two Different Promoter Types at All  
286 Protein-Coding Genes in Yeast. *Mol Cell* **60**, 422-434,  
287 doi:10.1016/j.molcel.2015.10.002 (2015).
- 288 17 Ramachandran, S., Zentner, G. E. & Henikoff, S. Asymmetric nucleosomes flank  
289 promoters in the budding yeast genome. *Genome Res* **25**, 381-390,  
290 doi:10.1101/gr.182618.114 (2015).
- 291 18 Badis, G. *et al.* A library of yeast transcription factor motifs reveals a widespread  
292 function for Rsc3 in targeting nucleosome exclusion at promoters. *Mol Cell* **32**, 878-  
293 887, doi:10.1016/j.molcel.2008.11.020 (2008).
- 294 19 Lorch, Y., Maier-Davis, B. & Kornberg, R. D. Role of DNA sequence in chromatin  
295 remodeling and the formation of nucleosome-free regions. *Genes Dev* **28**, 2492-2497,  
296 doi:10.1101/gad.250704.114 (2014).
- 297 20 Kubik, S. *et al.* Sequence-Directed Action of RSC Remodeler and General Regulatory  
298 Factors Modulates +1 Nucleosome Position to Facilitate Transcription. *Mol Cell* **71**, 89-  
299 102 e105, doi:10.1016/j.molcel.2018.05.030 (2018).
- 300 21 Asturias, F. J., Chung, W. H., Kornberg, R. D. & Lorch, Y. Structural analysis of the RSC  
301 chromatin-remodeling complex. *Proc Natl Acad Sci U S A* **99**, 13477-13480,  
302 doi:10.1073/pnas.162504299 (2002).
- 303 22 Chaban, Y. *et al.* Structure of a RSC-nucleosome complex and insights into chromatin  
304 remodeling. *Nat Struct Mol Biol* **15**, 1272-1277, doi:10.1038/nsmb.1524 (2008).
- 305 23 Leschziner, A. E. *et al.* Conformational flexibility in the chromatin remodeler RSC  
306 observed by electron microscopy and the orthogonal tilt reconstruction method. *Proc*  
307 *Natl Acad Sci U S A* **104**, 4913-4918, doi:10.1073/pnas.0700706104 (2007).
- 308 24 Li, M. *et al.* Mechanism of DNA translocation underlying chromatin remodelling by  
309 Snf2. *Nature* **567**, 409-413, doi:10.1038/s41586-019-1029-2 (2019).
- 310 25 Schubert, H. L. *et al.* Structure of an actin-related subcomplex of the SWI/SNF  
311 chromatin remodeler. *Proc Natl Acad Sci U S A* **110**, 3345-3350,  
312 doi:10.1073/pnas.1215379110 (2013).
- 313 26 Kasten, M. *et al.* Tandem bromodomains in the chromatin remodeler RSC recognize  
314 acetylated histone H3 Lys14. *EMBO J* **23**, 1348-1359, doi:10.1038/sj.emboj.7600143  
315 (2004).

Wagner et al., RSC-nucleosome complex structure

- 316 27 Treich, I., Ho, L. & Carlson, M. Direct interaction between Rsc6 and Rsc8/Swh3, two  
317 proteins that are conserved in SWI/SNF-related complexes. *Nucleic Acids Res* **26**, 3739-  
318 3745, doi:10.1093/nar/26.16.3739 (1998).
- 319 28 Taneda, T. & Kikuchi, A. Genetic analysis of RSC58, which encodes a component of a  
320 yeast chromatin remodeling complex, and interacts with the transcription factor Swi6.  
321 *Mol Genet Genomics* **271**, 479-489, doi:10.1007/s00438-004-0999-3 (2004).
- 322 29 Chambers, A. L., Pearl, L. H., Oliver, A. W. & Downs, J. A. The BAH domain of Rsc2 is a  
323 histone H3 binding domain. *Nucleic Acids Res* **41**, 9168-9182, doi:10.1093/nar/gkt662  
324 (2013).
- 325 30 VanDemark, A. P. *et al.* Autoregulation of the rsc4 tandem bromodomain by gcn5  
326 acetylation. *Mol Cell* **27**, 817-828, doi:10.1016/j.molcel.2007.08.018 (2007).
- 327 31 Saha, A., Wittmeyer, J. & Cairns, B. R. Chromatin remodeling through directional DNA  
328 translocation from an internal nucleosomal site. *Nat Struct Mol Biol* **12**, 747-755,  
329 doi:10.1038/nsmb973 (2005).
- 330 32 Cairns, B. R., Erdjument-Bromage, H., Tempst, P., Winston, F. & Kornberg, R. D. Two  
331 actin-related proteins are shared functional components of the chromatin-remodeling  
332 complexes RSC and SWI/SNF. *Mol Cell* **2**, 639-651 (1998).
- 333 33 Sen, P. *et al.* The SnAC domain of SWI/SNF is a histone anchor required for remodeling.  
334 *Mol Cell Biol* **33**, 360-370, doi:10.1128/MCB.00922-12 (2013).
- 335 34 Lorch, Y., Maier-Davis, B. & Kornberg, R. D. Histone Acetylation Inhibits RSC and  
336 Stabilizes the +1 Nucleosome. *Mol Cell* **72**, 594-600 e592,  
337 doi:10.1016/j.molcel.2018.09.030 (2018).
- 338 35 Cao, Y., Cairns, B. R., Kornberg, R. D. & Laurent, B. C. Sfh1p, a component of a novel  
339 chromatin-remodeling complex, is required for cell cycle progression. *Mol Cell Biol* **17**,  
340 3323-3334, doi:10.1128/mcb.17.6.3323 (1997).
- 341 36 Sen, P., Ghosh, S., Pugh, B. F. & Bartholomew, B. A new, highly conserved domain in  
342 Swi2/Snf2 is required for SWI/SNF remodeling. *Nucleic Acids Res* **39**, 9155-9166,  
343 doi:10.1093/nar/gkr622 (2011).
- 344 37 Cakiroglu, A. *et al.* Genome-wide reconstitution of chromatin transactions reveals that  
345 RSC preferentially disrupts H2AZ-containing nucleosomes. *Genome Res* **29**, 988-998,  
346 doi:10.1101/gr.243139.118 (2019).
- 347 38 Suto, R. K., Clarkson, M. J., Tremethick, D. J. & Luger, K. Crystal structure of a  
348 nucleosome core particle containing the variant histone H2A.Z. *Nat Struct Biol* **7**, 1121-  
349 1124, doi:10.1038/81971 (2000).
- 350 39 Materne, P. *et al.* Histone H2B ubiquitylation represses gametogenesis by opposing  
351 RSC-dependent chromatin remodeling at the ste11 master regulator locus. *Elife* **5**,  
352 doi:10.7554/eLife.13500 (2016).
- 353 40 Angus-Hill, M. L. *et al.* A Rsc3/Rsc30 zinc cluster dimer reveals novel roles for the  
354 chromatin remodeler RSC in gene expression and cell cycle control. *Mol Cell* **7**, 741-  
355 751 (2001).
- 356 41 Brogaard, K., Xi, L., Wang, J. P. & Widom, J. A map of nucleosome positions in yeast at  
357 base-pair resolution. *Nature* **486**, 496-501, doi:10.1038/nature11142 (2012).
- 358 42 Yan, Z. *et al.* PBAF chromatin-remodeling complex requires a novel specificity subunit,  
359 BAF200, to regulate expression of selective interferon-responsive genes. *Genes Dev*  
360 **19**, 1662-1667, doi:10.1101/gad.1323805 (2005).
- 361 43 Waterhouse, A. *et al.* SWISS-MODEL: homology modelling of protein structures and  
362 complexes. *Nucleic Acids Res* **46**, W296-W303, doi:10.1093/nar/gky427 (2018).



Wagner et al., RSC-nucleosome complex structure

- 363 44 Xue, Y. *et al.* The human SWI/SNF-B chromatin-remodeling complex is related to yeast  
364 rsc and localizes at kinetochores of mitotic chromosomes. *Proc Natl Acad Sci U S A* **97**,  
365 13015-13020, doi:10.1073/pnas.240208597 (2000).
- 366 45 Sandhya, S., Maulik, A., Giri, M. & Singh, M. Domain architecture of BAF250a reveals  
367 the ARID and ARM-repeat domains with implication in function and assembly of the  
368 BAF remodeling complex. *PLoS One* **13**, e0205267, doi:10.1371/journal.pone.0205267  
369 (2018).
- 370 46 Yan, L., Wu, H., Li, X., Gao, N. & Chen, Z. Structures of the ISWI-nucleosome complex  
371 reveal a conserved mechanism of chromatin remodeling. *Nat Struct Mol Biol* **26**, 258-  
372 266, doi:10.1038/s41594-019-0199-9 (2019).
- 373 47 Farnung, L., Vos, S. M., Wigge, C. & Cramer, P. Nucleosome-Chd1 structure and  
374 implications for chromatin remodelling. *Nature* **550**, 539-542,  
375 doi:10.1038/nature24046 (2017).
- 376 48 Sundaramoorthy, R. *et al.* Structure of the chromatin remodelling enzyme Chd1 bound  
377 to a ubiquitylated nucleosome. *Elife* **7**, doi:10.7554/eLife.35720 (2018).
- 378 49 Willhoft, O. *et al.* Structure and dynamics of the yeast SWR1-nucleosome complex.  
379 *Science* **362**, doi:10.1126/science.aat7716 (2018).
- 380 50 Ayala, R. *et al.* Structure and regulation of the human INO80-nucleosome complex.  
381 *Nature* **556**, 391-395, doi:10.1038/s41586-018-0021-6 (2018).
- 382 51 Eustermann, S. *et al.* Structural basis for ATP-dependent chromatin remodelling by the  
383 INO80 complex. *Nature* **556**, 386-390, doi:10.1038/s41586-018-0029-y (2018).
- 384 52 Knoll, K. R. *et al.* The nuclear actin-containing Arp8 module is a linker DNA sensor  
385 driving INO80 chromatin remodeling. *Nat Struct Mol Biol* **25**, 823-832,  
386 doi:10.1038/s41594-018-0115-8 (2018).
- 387

388 **FIGURE LEGENDS**

389

390 **Figure 1 | Structure of RSC-nucleosome complex.**

391 **a.** Overall architecture presented in two views of the low pass-filtered cryo-EM density. The  
392 five RSC modules are in different colours. Colour code for modules used throughout. The  
393 nucleosome substrate with exit DNA is in yellow. DIM, DNA-interaction module.

394 **b.** Schematic of RSC subunit domain architecture. Colour code for subunits used throughout.  
395 Domain boundaries are marked with residue numbers and black bars indicate modelled regions.  
396 HSA, helicase-SANT-associated; SnAC, Snf2 ATP coupling; bromo, bromodomain; armadillo,  
397 armadillo repeat fold; RFX, DNA-binding RFX-type winged-helix; SWIRM, Swi3 Rsc8 Moira;  
398 ZZ, ZZ-type zinc finger; SANT, Swi3 Ada N-Cor TFIIIB; coiled coil, C-terminal helix forming  
399 coiled coil-like structure; Zn, Zn(2)-C6 fungal-type zinc finger; RPT, repeat; BAH, bromo-  
400 adjacent homology.

401 **c.** Cartoon representation. Unassigned elements shown in grey. Mobile domains depicted  
402 schematically. Arrows indicate directionality of DNA translocation.

403

404 **Figure 2 | Structure of RSC body and arm modules.**

405 Cartoon representation viewed as in Figure 1. Important structural elements are labelled.

406

407 **Figure 3 | ATPase-nucleosome interactions.**

408 **a.** Contacts of Sth1 ATPase motor (orange) with the nucleosome. View as in Fig. 1c, left, but  
409 rotated by 45° around a horizontal axis. Arrows indicate directionality of DNA translocation.

410 **b.** View along the nucleosome dyad (black oval). View is as in Fig. 1c, right, but rotated by 45°  
411 around a horizontal axis.

412

413 **Figure 4 | RSC sandwiches the nucleosome.**

414 **a.** RSC-nucleosome interactions viewed along the nucleosome dyad (black oval). On the outer  
415 face of the histone octamer, densities for the Sth1 SnAC domain and the histone H4 tail are  
416 shown as an orange surface and a green mesh, respectively. On the inner face, the arm module  
417 and Sfh1 finger helix are depicted.

418 **b.** Interaction of the Sfh1 finger helix with the acidic patch of the inner face of the histone  
419 octamer (surface representation coloured by electrostatic charge; red, negative; blue, positive).  
420 Conserved arginine residues are shown with side chains. Residues mutated in human cancer  
421 (Methods) are highlighted in purple.

422 **c.** Sequence alignment of the finger helix region (red cylinder) in *S. cerevisiae* (Sc) Sfh1 with  
423 its homologs *H. sapiens* (Hs) BAF47, *M. musculus* (Mm) BAF47, *D. melanogaster* (Dm) SNR1  
424 and ScSnf5. Invariant and conserved residues in dark and light blue, respectively. Arginine  
425 residues shown in (b) highlighted in yellow. A purple dot marks residues mutated in cancer  
426 (Methods).

427

428 **Figure 5 | DNA recognition and NDR formation.**

429 **a.** Space-filling RSC-nucleosome structure with DIM (green) and SnAC (orange) densities.  
430 View on the top as in Fig. 1c, left, but rotated by 90°. Arrows indicate directionality of DNA  
431 translocation. Number of upstream DNA base pairs relative to SHL -7 is provided.

Wagner et al., RSC-nucleosome complex structure

432 **b.** Schematic of a promoter before (top) and after (bottom) RSC remodelling shows NDR  
433 formation by sliding the flanking -1 and +1 nucleosomes away from the NDR center. Arrows  
434 indicate the transcription start site.

435

436 **Figure 6 | Remodeller families and cancer mutations.**

437 **a.** Conservation between SWI/SNF complexes RSC (yeast) and PBAF (human). Residues that  
438 are identical (blue) or conserved (light blue) in human PBAF highlighted on the RSC structure  
439 (grey). Purple spheres depict identical residues that are mutated in various cancers (Methods).

440 **b.** Comparison of overall structure of RSC with complexes of CHD (yeast CHD1<sup>47</sup>) and INO80  
441 (yeast INO80<sup>51</sup>) families. ATPase motor domains are shown in orange, DNA in blue.

442

443

444 **METHODS**

445

446 **Preparation of RSC complex**

447 The yeast *Saccharomyces cerevisiae* contains two isoforms of RSC that comprise either the  
448 subunit Rsc1 or its homologue Rsc2<sup>53</sup> (**Extended Data Table 1**). We isolated the Rsc2-  
449 containing isoform. The *RSC2-TAP-HIS3* yeast strain (YSC1177-YLR357W) was purchased  
450 from the Dharmacon TAP-tagged open reading frame (ORF) library. A colony from a YP agar  
451 plate supplemented with 2% glucose (w/v) was used to prepare a 2 L pre-culture in YPD  
452 medium with 50 µg/mL ampicillin sodium salt and 12.5 µg/mL with OD<sub>600</sub> of 1.6. Cells were  
453 fermented from OD<sub>600</sub> ~0.006 to OD<sub>600</sub> ~10 in 250 L of 3% YEP broth (w/v, Formedium)  
454 supplemented with 2% glucose, 50 g/L ampicillin sodium salt and 12.5 g/L tetracyclin-  
455 hydrochloride. The pellet was resuspended in cold 2x lysis buffer (100 mM HEPES pH 7.6,  
456 20% glycerol (v/v), 1.4 M KAc, 2 mM MgCl<sub>2</sub>, 2 mM DTT and 3x protease inhibitor (100x:  
457 0.028 mg/mL leupeptin, 0.137 mg/mL pepstatin A, 17 mg/mL PMSF, 33 mg/mL  
458 benzamidine)), frozen in liquid nitrogen to pea-sized granules and stored at -80 °C.

459 RSC was purified based on the TAP-tag purification strategy<sup>8,54,55</sup>, with several  
460 modifications. All purification procedures were performed at 4 °C unless stated otherwise. 600  
461 g yeast granules were lysed by cryo-milling (Spex Freezer/Mill 6875D) and stored at -80 °C.  
462 Yeast powder was thawed at 30 °C, diluted with 100 mL 1x lysis buffer and cleared by  
463 centrifugation (25,200 xg). The supernatant was incubated for 6 h with 10 mL IgG Sepharose  
464 6 Fast Flow resin (GE Healthcare) pre-equilibrated in lysis buffer. The resin was recovered by  
465 centrifugation (3,200 xg) and washed with 100 mL elution buffer A (50 mM K-HEPES, pH  
466 7.6, 150 mM KAc, 10% glycerol (v/v), 3 mM CaCl<sub>2</sub>, 1 mM imidazole, 1 mM DTT, 0.5x  
467 protease inhibitor). IgG resin was resuspended in 10 mL elution buffer A, mixed with 2 mL  
468 calmodulin resin (Agilent Technologies) pre-equilibrated in elution buffer A and supplied with  
469 catalytic amounts of TEV protease. The resin was washed with 100 mL elution buffer A without  
470 protease inhibitors, and protein was eluted with 50 mL elution buffer B (3 mM EGTA instead  
471 of 3 mM CaCl<sub>2</sub>). Elution was applied to a HiTrap Q 1 mL HP column (GE Healthcare) pre-  
472 equilibrated with Q-150 buffer (50 mM HEPES pH 7.6, 150 mM KAc, 10% glycerol, 1 mM  
473 DTT) and washed with 10 CV Q-150 buffer. Protein was eluted with a linear gradient from 0 –  
474 100 % buffer Q-1500 (1.5 M KAc instead of 150 mM KAc) over 50 CV. RSC-containing  
475 fractions were concentrated, dialysed overnight to 50 mM HEPES pH 7.6, 150 mM KAc, 10%  
476 glycerol, 5 mM MgCl<sub>2</sub>, 1 mM DTT, and immediately used for cryo-EM sample preparation.  
477 Typical yields were 0.2 – 0.3 mg from 300 g yeast pellet.

478

479 **Preparation of nucleosome substrates**

480 *Xenopus leavis* histones were expressed and purified as described<sup>56,57</sup>. Briefly, histones were  
481 purified as inclusion bodies using a Dounce tissue grinder (Sigma-Aldrich). Histones were  
482 aliquoted, flash-frozen, lyophilised, and stored at -80 °C. For octamer preparation, lyophilised  
483 histones were resuspended in unfolding buffer (20 mM HEPES pH 7.5, 7 M guanidinium  
484 hydrochloride, 10 mM DTT) to a concentration of 3 mg/mL. Histones H2A, H2B, H3 and H4  
485 were combined at a molar ratio of 1.2:1.2:1:1 and dialysed against two times 2 L of refolding  
486 buffer (10 mM HEPES pH 7.5, 2 M NaCl, 1 mM EDTA, 2.5 mM DTT) for a total of 12 h at 4  
487 °C. The sample was concentrated and applied to a Superdex 200 Increase 10/300 size exclusion

## Wagner et al., RSC-nucleosome complex structure

488 column pre-equilibrated with refolding buffer. Peak fractions were pooled and frozen in liquid  
489 nitrogen at a concentration of 1.34 mg/mL.

490 DNA fragments for nucleosome reconstruction were prepared by PCR as described<sup>58</sup>.  
491 gBlock DNA (IDT) containing the 145-bp Widom 601 sequence<sup>59</sup> with a 55 bp extension at the  
492 5'-end and a 37 bp extension at the 3'-end was used as a template together with two primers  
493 (forward: TCATTACCCAGCCCGCCTAG, reverse:  
494 CCTACGGACCGGATATCTTCCCTG). Reactions were pooled (42 mL) and DNA products  
495 recovered by phenol-chloroform-extraction. DNA was resuspended in MilliQ water and applied  
496 to a Superose 6 Increase 10/300 size exclusion chromatography column pre-equilibrated in gel  
497 filtration buffer (20 mM HEPES pH 7.5, 200 mM NaCl, 1 mM EDTA). Peak fractions were  
498 pooled, concentrated ten times, and stored at -20 °C.

499 Nucleosome reconstitution was performed as described<sup>57</sup>, with minor modifications.  
500 DNA and histone octamer were mixed at a 1:1.2 molar ratio in reconstitution buffer (20 mM  
501 HEPES pH 7.5, 1 mM EDTA, 2 mM DTT) containing 2 M NaCl and incubated for 30 min on  
502 ice. Sample was transferred to a Slide-A-Lyzer 3.5K MWCO MINI device and gradient-  
503 dialysed from 500 ml high salt reconstitution buffer against 2 L of low salt reconstitution buffer  
504 (20 mM NaCl) for 22 h. After a heat shift for 30 min at 50 °C, the sample was recovered and  
505 immediately used for complex formation.

506

### 507 **RSC-nucleosome complex formation**

508 Newly prepared RSC complex was mixed with ADP-BeF<sub>3</sub> at a final concentration of 1 mM and  
509 incubated on ice for 30 min. A 1.6-fold molar excess of the nucleosome substrate was added,  
510 the mixture incubated for 15 min at 30 °C and transferred back on ice. RSC-nucleosome  
511 complex was cross-linked using the GraFix method<sup>60</sup>. The sample was applied to a gradient  
512 generated from a 10% sucrose light solution (10% sucrose (w/v), 50 mM HEPES pH 7.6, 150  
513 mM KAc, 5% glycerol (v/v), 2 mM MgCl<sub>2</sub>, 1 mM DTT, 0.5 mM ADP-BeF<sub>3</sub>) and a 25% sucrose  
514 heavy solution (25% sucrose (w/v) instead of 10%) containing 0.2% glutaraldehyde crosslinker  
515 with a BioComp Gradient Master 108 (BioComp Instruments). Centrifugation was carried out  
516 for 16 h at 32,000 rpm in a SW 60 Ti swinging-bucket rotor (Beckmann) at 4 °C. 200 µL  
517 fractions were collected and quenched with aspartate (pH 7.5) at a final concentration of 50  
518 mM. Fractions containing RSC-nucleosome complex were dialysed for 8 h at 4 °C to 20 mM  
519 HEPES pH 7.6, 150 mM KAc, 1% glycerol (v/v), 3 mM MgCl<sub>2</sub>, 1 mM DTT and applied to  
520 cryo-EM grids.

521

### 522 **Cryo-EM analysis of RSC-nucleosome complex**

523 RSC-nucleosome complex was absorbed to a thin carbon film before plunge freezing as  
524 described<sup>61</sup>, with minor modifications. A small, thin (~3.1 nm) carbon film was floated from  
525 the mica sheet onto a 50 µL drop of sample and incubated for 2 – 3 min. The carbon film was  
526 recovered with copper R2/1 or R3.5/1 grids (Quantifoil) and vitrified by plunge-freezing in  
527 liquid ethane using a Vitrobot Mark IV (FEI) operated at 4 °C and 100% humidity.

528 Electron micrographs were acquired on an FEI Titan Krios G2 transmission electron  
529 microscope operated at 300 keV in EFTEM mode, equipped with a Quantum LS 967 energy  
530 filter (Gatan), zero loss mode, 30 eV slit width, and a K2 Summit direct electron detector  
531 (Gatan) in counting mode. Automated data acquisition was done using the FEI EPU software  
532 package at a nominal magnification of 130,000x, resulting in a calibrated pixel size of 1.05

533 Å/px. Micrographs for the two datasets were collected at a dose rate of  $4.78 \text{ e}^-/\text{Å}^2/\text{s}$  over 10 s  
534 resulting in a total dose of  $47.8 \text{ e}^-/\text{Å}^2$ , and at a dose rate of  $5.67 \text{ e}^-/\text{Å}^2/\text{s}$  over 8 s resulting in a  
535 total dose of  $45.4 \text{ e}^-/\text{Å}^2$ , respectively. Both datasets were dose fractionated over 40 frames.

536 Dose weighting, CTF estimation and motion correction were carried out during data  
537 collection using Warp<sup>62</sup>. Automated particle picking by Warp resulted in 112,657 particles from  
538 the first dataset (4404 micrographs) and 1,119,875 particles from the second dataset (19,415  
539 micrographs). Particle coordinates were exported, combined, extracted and processed using  
540 RELION 3.0<sup>63</sup>. Removal of bad particles through global 3D classifications with a negative stain  
541 reconstruction of the RSC complex as reference resulted in high-quality particles that could be  
542 refined to an overall map of the RSC remodeler together with the nucleosome (map 1) at a  
543 resolution of  $\sim 15 \text{ Å}$ . Further processing of the particles revealed great flexibility and dynamics  
544 which could not be resolved by focused 3D classifications and refinements.

545 The particles corresponding to the RSC-nucleosome map were reextracted centred on  
546 the nucleosome with a box mainly including the nucleosome and the ATPase module. Global  
547 3D classification resulted in a good class that revealed the Sth1 subunit bound to the  
548 nucleosome. Focused 3D refinement excluding the Sth1 density provided a nucleosome map  
549 (map 2) at a resolution of  $3.6 \text{ Å}$  (gold-standard Fourier shell correlation 0.143 criterion) and a  
550 B-factor of  $-155 \text{ Å}^2$ . Improvement of the Sth1 density turned out to be very difficult and showed  
551 its highly dynamic nature in this sample. A strategy of focused 3D classification without image  
552 alignment on the Sth1 part, followed by a global 3D refinement and additional focused 3D  
553 classification on the combined Sth1-nucleosome density led to the best results. A focused 3D  
554 classification and postprocessing with automatic B-factor determination in RELION resulted  
555 in an overall resolution of the Sth1-nucleosome map of  $4.3 \text{ Å}$  (FSC 0.143 criterion) and B-factor  
556 of  $-186 \text{ Å}^2$  (map 3) (**Extended Data Fig. 2**). The nucleosome alone could be resolved to  $3.6 \text{ Å}$   
557 (FSC 0.143 criterion) using a B-factor of  $-156 \text{ Å}^2$  (map 2) (**Extended Data Fig. 2**). Final  
558 focused maps were combined using the Frankenmap tool distributed with Warp (map 7)  
559 (**Extended Data Fig. 2**). Masks encompassing the regions of interest were created with UCSF  
560 Chimera<sup>64</sup> and RELION.

561

## 562 **Cryo-EM analysis of the free RSC complex**

563 Freshly purified RSC complex was mixed with ADP-BeF<sub>3</sub> to a final concentration of 1 mM and  
564 incubated for 15 min on ice. BS3 (bis(sulfosuccinimidyl(suberate))) cross-linker (Thermo  
565 Fischer Scientific) was added to a final concentration of 1 mM, incubated on ice for 30 min  
566 before quenching with Tris-HCl, pH 7.5, and ammonium bicarbonate at a final concentration  
567 of 100 mM and 20 mM, respectively. After size exclusion chromatography using a Sepharose  
568 6 Increase 3.2/300 column (GE Healthcare) pre-equilibrated in gel filtration buffer (50 mM  
569 HEPES pH 7.6, 150 mM KAc, 4 mM MgCl<sub>2</sub>, 1 mM DTT), peak fractions were immediately  
570 applied to cryo-EM grids. 4  $\mu\text{L}$  of sample were applied to glow-discharged (Pelco easiGlow)  
571 R2/2 gold grids (Quantifoil). Grids were blotted and vitrified as described above.

572 Cryo-EM data was collected as described above, with small modifications. The energy  
573 filter slit width was set to 20 eV. Micrographs for the two 0° tilt datasets were collected at a  
574 dose rate of  $4.88 \text{ e}^-/\text{Å}^2/\text{s}$  for 8 s resulting in a total dose of  $39 \text{ e}^-/\text{Å}^2$  and at a dose rate of  $5.02 \text{ e}^-$   
575  $/\text{Å}^2/\text{s}$  over 9 s resulting in a total dose of  $45.2 \text{ e}^-/\text{Å}^2$ , respectively, and fractionated over 40  
576 frames. The third, 25° tilted dataset was acquired in 44 frames at a dose rate of  $4.99 \text{ e}^-/\text{Å}^2/\text{s}$  for  
577 11 s resulting in a total dose of  $54.9 \text{ e}^-/\text{Å}^2$ .

578 Pre-processing and particle picking was carried out as described above and resulted in  
579 205,990 particles from the first dataset (1787 micrographs), 170,028 particles from the second  
580 dataset (1216 micrographs) and 475,168 particles from the tilted dataset (3158 micrographs).  
581 Particles were processed with global 3D classifications using RELION-3<sup>63</sup> and a negative stain  
582 reconstruction of the RSC complex as a first reference to obtain an improved initial reference.  
583 All 1,009,020 particles were newly extracted and bad particles were sorted out in multiple  
584 rounds of global 3D classifications in combination with global 3D refinements. The best  
585 resulting class was refined with a mask excluding the flexible DNA-interaction module (DIM).  
586 Particles corresponding to this reconstruction were subjected to CTF refinement and Bayesian  
587 polishing in RELION. Using focused 3D refinements, the maps for the arm module, and body2  
588 and body1 submodules were further improved. Postprocessing with automatic B-factor  
589 determination in RELION resulted in overall resolutions of 3.8 Å, 3.6 Å and 3.6 Å, respectively,  
590 and B-factors of  $-136 \text{ \AA}^2$ ,  $-100 \text{ \AA}^2$  and  $-103 \text{ \AA}^2$ , respectively (**Extended Data Figure 3**). Final  
591 focused maps were combined with Warp (**Extended Data Figure 3**).

592

### 593 **Structural modelling**

594 The lower resolution cryo-EM map 1 of the RSC-nucleosome complex was used to align the  
595 individually generated cryo-EM maps 2 – 8. The combined cryo-EM map 7 was used for model  
596 building of the Sth1 subunit bound to the nucleosome. The final map was created with the local  
597 resolution tool from RELION and a B-factor of  $-150 \text{ \AA}^2$ . The structure of the yeast Snf2 bound  
598 to the nucleosome in the ADP-BeF<sub>3</sub> state (PDB code 5Z3U)<sup>24</sup> was used as basis for modelling.  
599 Published data together with the close homology between Sth1 and Snf2 (**Extended Data Fig.**  
600 **6**) suggest that Sth1 also binds at SHL +2. The remodeler and the nucleosome part were fitted  
601 separately. The *Xenopus laevis* histones and Widom 601 sequence of PDB 5Z3U were the same  
602 as used in our study. The nucleosome structure was rigid-body fitted into our cryo-EM map in  
603 UCSF Chimera<sup>64</sup> and the entry side DNA and histone tails trimmed according to the density in  
604 COOT<sup>65</sup>. Due to lower resolution, amino acid side chains of residues 15 – 22 of H4 (chain B)  
605 were stubbed in COOT. The nucleosome structure was flexibly fitted using Namdinator<sup>66</sup> and  
606 real space refined in PHENIX<sup>67</sup> with secondary structure restraints (including base pairing and  
607 base stacking restraints).

608 High conservation of amino acids between Sth1 and Snf2 (**Extended Data Figure 6**)  
609 allowed for generation of a Sth1 homology model with Rosetta<sup>68,69</sup>. The homology model was  
610 trimmed according to the density in COOT, Brace-II helix was removed, and amino acid side  
611 chains were stubbed owing to the lower resolution of the map area before rigid-body docking  
612 using UCSF Chimera. Additional real space refinement with secondary structure restraints  
613 (including base pairing and base stacking restraints) was performed in PHENIX. The  
614 overhanging exit side DNA was modelled by generating a bend B-DNA following the density  
615 in map 1 in 3D-DART<sup>70</sup>. The DNA duplex was connected to the nucleosomal Widom 601 DNA  
616 and geometry optimized with base pairing and base stacking restraints in PHENIX.

617 Map 1 allowed for the rigid-body docking of the crystal structure of the Arp module  
618 bound to the Snf2 HSA region (PDB code 4I6M)<sup>25</sup> using UCSF Chimera. The amino acid  
619 residues of the Snf2 HSA helix were mutated to the ones from Sth1 according to sequence  
620 alignment (**Extended Data Fig. 6**) starting at the C-terminus and ignoring gaps. The model for  
621 the Sth1 HSA helix is thus an extrapolation based on the strong  $\alpha$ -helical secondary structure  
622 prediction and the register might differ slightly<sup>25</sup>.

623 The combined cryo-EM map 8 and the focused refined maps 4 – 6 were also used for  
624 model building. SWISS-MODEL<sup>43,71</sup> was used to generate homology models for the Rsc58 N-  
625 terminal bromodomain (PDB code 3LJW)<sup>72</sup>, the Rsc6 SWIB domain (PDB code 1UHR), the  
626 Rsc8 SWIRM (PDB code 2FQ3)<sup>73</sup>, SANT (PDB code 2YUS) and ZZ zinc finger domains (PDB  
627 code 1TOT)<sup>74</sup>, the Rsc9 armadillo-like domain (PDB code 4V3Q)<sup>75</sup> and the Sfh1 RPT1 and  
628 RPT2 domains (PDB code 6AX5). The homology models were rigid-body placed using UCSF  
629 Chimera<sup>64</sup> and manually adjusted and re-build in COOT<sup>65</sup>.

630 The quality of the maps allowed for *de novo* building of the other model parts  
631 (**Extended Data Table 2**). Modelling was guided and validated by BS3 cross-linking data  
632 visualized with xVis<sup>76</sup> and secondary structure predictions performed with Quick2D<sup>77</sup> and  
633 PSIPRED<sup>78,79</sup>. Amino acid residues connecting the domains of the two Rsc8 subunits could not  
634 be modelled. For clarification, they were placed into a single chain (chain L) clustered by  
635 proximity. The Sfh1 C-terminal finger helix was built into the density of map 7. A poly-alanine  
636 model was placed into density that could not be assigned to any RSC subunit (chain X). Bulky  
637 amino acid side chain density in the maps 4 – 8 enabled us to assign the sequence registers,  
638 however in some regions register shifts cannot be entirely excluded. The modelled RSC  
639 subunits Rsc4, Rsc58, Rsc6, Rsc8, Rsc9, Npl6, Htl1, Sfh1 and Sth1 (residues 48 – 293) together  
640 with the poly-alanine chain were applied to several rounds of real space refinement and  
641 geometry optimisation using PHENIX<sup>67</sup>, and flexible fitting with Namdinator<sup>66</sup> against the  
642 combined map 8. MolProbity<sup>80</sup> was used to flip and optimise Asn, Gln and His side chains. The  
643 C-terminal helix of Sfh1 was real space refined with PHENIX against map 7. The final structure  
644 displayed excellent stereochemistry as shown by MolProbity (**Extended Data Table 3**).  
645 Figures were created using PyMol<sup>81</sup>, UCSF Chimera<sup>64</sup> and UCSF ChimeraX<sup>82</sup>. The angular  
646 distribution plots were generated using the AngularDistribution tool distributed with Warp<sup>62</sup>.

647 Sites of mutations found in human cancers were derived from the cBio cancer genomics  
648 portal (cBioPortal)<sup>83,84</sup> and mapped onto the RSC structure for residues that are identical in its  
649 human counterpart PBAF using MSAProbs<sup>77,85</sup>. MSAPobs and Aline<sup>86</sup> were used to map  
650 conservation between RSC and PBAF.

651

## 652 **Preparation of cross-linking samples for mass spectrometry**

653 RSC-nucleosome complex was prepared as described above. The cross-linking reaction was  
654 performed with BS3 (bis(sulfosuccinimidyl(suberate))) cross-linker (Thermo Fischer  
655 Scientific) at a final concentration of 1 mM on ice for 30 min before quenching with Tris-HCl,  
656 pH 7.5, and ammonium bicarbonate at a final concentration of 100 mM and 20 mM,  
657 respectively. The cross-linked sample was applied to a 10% – 25% sucrose gradient as  
658 described above (no glutaraldehyde in the heavy solution) and protein containing fractions were  
659 pooled (~800  $\mu$ L, ~50  $\mu$ g complex) applied to in-solution digest. 150  $\mu$ L of urea buffer (8 M  
660 urea, 50 mM  $\text{NH}_4\text{HCO}_3$  pH 8) and 60  $\mu$ L 0.1 M DTT (in 50 mM  $\text{NH}_4\text{HCO}_3$  pH 8) were added  
661 to reduce the sample for 30 min at 37 °C, 300 rpm. The sample was alkylated with 60  $\mu$ L 0.4  
662 M iodoacetamide (in 50 mM  $\text{NH}_4\text{HCO}_3$  pH 8) for 30 min at 37 °C, 300 rpm, in the dark. The  
663 reaction was quenched by addition of 60  $\mu$ L 0.1 M DTT (in 50 mM  $\text{NH}_4\text{HCO}_3$  pH 8). The  
664 sample was digested for 30 min at 37 °C with 0.5  $\mu$ L Pierce Universal Nuclease (250 U/ $\mu$ l) in  
665 presence of 1 mM  $\text{MgCl}_2$ . The final sample volume was adjusted to 1200  $\mu$ L with 50 mM  
666  $\text{NH}_4\text{HCO}_3$  pH 8 resulting in a final urea concentration of 1 M. Trypsin digest was performed  
667 overnight at 37 °C with 2.5  $\mu$ g trypsin (Promega, V5111). Tryptic peptides were desalted with



## Wagner et al., RSC-nucleosome complex structure

668 C18 spin columns (Harvard Apparatus 74-4601), lyophilized and dissolved in 30% (v/v)  
669 acetonitrile, 0.1% (v/v) trifluoroacetic acid. The peptide mixture was separated on a Superdex  
670 Peptide 3.2/300 (GE Healthcare) column run at 50  $\mu$ L/min with 30% (v/v) acetonitrile, 0.1%  
671 (v/v) trifluoroacetic acid. Cross-linked species are enriched by size exclusion chromatography  
672 based on their higher molecular weight compared to linear peptides. Therefore 50  $\mu$ L fractions  
673 were collected from 1.0 mL post-injection. Fractions from 1.0 – 1.6 mL post-injection were  
674 dried in a speed-vac and dissolved in 5% (v/v) acetonitrile, 0.05% (v/v) trifluoroacetic acid and  
675 subjected to LC-MS/MS.

676

### 677 **LC-MS/MS analysis and cross-link identification**

678 LC-MS/MS analyses were performed on a Q Exactive HF-X hybrid quadrupole-orbitrap mass  
679 spectrometer (Thermo Scientific) coupled to a Dionex Ultimate 3000 RSLCnano system. The  
680 peptide mixtures from in-solution digest were loaded on a Pepmap 300 C18 column (Thermo  
681 Fisher) at a flow rate of 10  $\mu$ L/min in buffer A (0.1 % (v/v) formic acid) and washed for 3 min  
682 with buffer A. The sample was separated on an in-house packed C18 column (30 cm; ReproSil-  
683 Pur 120 Å, 1.9  $\mu$ m, C18-AQ; inner diameter, 75  $\mu$ m) at a flow rate of 300 nL/min. Sample  
684 separation was performed over 120 min using a buffer system consisting of 0.1 % (v/v) formic  
685 acid (buffer A) and 80 % (v/v) acetonitrile, 0.08 % (v/v) formic acid (buffer B). The main  
686 column was equilibrated with 5 % B, followed by sample application and a wash with 5 % B.  
687 Peptides were eluted by a linear gradient from 15 – 48 % B. The gradient was followed by a  
688 wash step at 95 % B and re-equilibration at 5 % B. Eluting peptides were analyzed in positive  
689 mode using a data-dependent top 30-acquisition methods. MS1 and MS2 resolution were set to  
690 120,000 and 30,000 FWHM, respectively. Precursors selected for MS2 were fragmented using  
691 30 % normalized, higher-energy collision-induced dissociation (HCD) fragmentation. Allowed  
692 charge states of selected precursors were +3 to +7. Further MS/MS parameters were set as  
693 follows: isolation width, 1.4  $m/z$ ; dynamic exclusion, 10 sec; max. injection time (MS1/MS2),  
694 60 ms / 200 ms. The lock mass option ( $m/z$  445.12002) was used for internal calibration. All  
695 measurements were performed in duplicates. The .raw files of all replicates were searched by  
696 the software pLink 2, version 2.3.1<sup>87</sup> against a customized protein database containing the  
697 expressed proteins and protein-protein crosslinks were filtered with 1 % FDR. Cross-links  
698 appearing less than three times were excluded to increase confidence and plotted using xVis<sup>76</sup>  
699 and xiNET<sup>88</sup>.

700

### 701 **Data availability statement**

702 Coordinate file for RSC-nucleosome complex structure was deposited with the Protein Data  
703 Bank with accession codes XXXX. The cryo-EM density maps were deposited with the  
704 Electron Microscopy Data Base (EMDB) with accession codes EMD-XXXX etc.

705

706

707

708 **EXTENDED DATA FIGURE LEGENDS**

709

710 **Extended Data Figure 1 | Preparation and characterization of RSC-nucleosome complex.**  
711 **Related to Figure 1.**

712 **a.** Preparation of endogenous Rsc2-containing isoform of the RSC complex from *S. cerevisiae*.  
713 Analysis of purified RSC by size-exclusion chromatography and SDS-PAGE showed high  
714 purity and homogeneity with stoichiometric subunits as assessable by Coomassie stain. Subunit  
715 identity was confirmed by mass spectrometry. The table shows the expected molecular weights  
716 of the RSC subunits.

717 **b.** Assembly of the RSC-nucleosome complex. SDS-PAGE analysis of the fractions 7 – 20 of  
718 a 10 – 25% sucrose gradient ultracentrifugation. Complex formation was successful as  
719 demonstrated by the co-migration of histones with the RSC complex. The unbound over-  
720 stoichiometric nucleosomes only migrated to fraction 7 and 8 (black arrow). Fraction 16 in the  
721 presence of cross-linker was used for cryo-EM grid preparation (dashed box).

722 **c.** Location of crosslinking sites mapped onto the structure. BS3 crosslinks that appeared at  
723 least in triplicates were mapped onto the RSC-nucleosome structure. Lysine residues involved  
724 in the crosslinking network are shown as blue spheres and crosslinked residues are connected  
725 with lines indicating permitted (blue) and non-permitted (red) crosslinking distances. 90% of  
726 the mapped crosslinks are within the permitted crosslinking distance which was set to 30 Å.  
727 The remaining 10% of non-permitted crosslinks likely reflect ambiguity caused by the presence  
728 of two identical Rsc8 subunits in the structure as well as flexibility of the complex in buffer or  
729 arise from technical errors.

730 **d.** Crosslinking network between subunits of the RSC-nucleosome complex. Subunits are  
731 coloured as in Figure 1. Crosslinks with a score above 2.5 are shown. A comprehensive list of  
732 crosslinks can be found in the Supplementary Table S1.

733

734 **Extended Data Figure 2 | Cryo-EM analysis of the RSC-nucleosome complex. Related to**  
735 **Figures 1 – 6.**

736 **a.** Representative cryo-EM micrograph of the RSC-nucleosome complex shows  
737 homogeneously distributed individual particles.

738 **b-d.** 2D class averages of the RSC-nucleosome (b), the Sth1-nucleosome subcomplex (c) and  
739 the nucleosome subcomplex (d).

740 **e.** Fourier shell correlation plots reveal the overall resolutions of the cryo-EM reconstructions.

741 **f.** Cryo-EM processing workflow for the reconstructions of the RSC-nucleosome, the Sth1-  
742 nucleosome subcomplex, and the nucleosome subcomplex. Particle distribution after 3D  
743 classifications is indicated below the corresponding map. The final maps are shown in colours.  
744 The masks used for focused classifications and refinements are colour coded corresponding to  
745 the final maps they were used for. Views are generally rotated by 180° with respect to Figure  
746 1c, left.

747 **g.** Local resolution estimation of the combined Sth1-nucleosome map as implemented in  
748 RELION<sup>63</sup>. We note that the resolution of the peripheral area with the Sth1 subunit is  
749 overestimated.

750 **h-j.** Angular distribution plot for all particles contributing to the final reconstructions of the  
751 RSC-nucleosome (h), the Sth1-nucleosome (i) and the nucleosome complex (j).

752

753 **Extended Data Figure 3 | Cryo-EM analysis of the free RSC complex. Related to Figures**  
754 **1 – 6.**

755 **a.** Representative cryo-EM micrograph of the free RSC complex shows homogeneously spaced  
756 individual particles.

757 **b.** 2D class averages of the free RSC complex.

758 **c.** Cryo-EM processing workflow for the reconstruction of the free RSC complex. Particle  
759 distribution after 3D classifications is indicated below the corresponding map. The final maps  
760 after focused 3D refinement and masks are depicted in colour. Views are generally rotated by  
761 180° with respect to Figure 1c, right.

762 **d.** Angular distribution plot for all particles contributing to the final reconstruction of the free  
763 RSC complex.

764 **e.** Two views of the combined RSC core map coloured according to the local resolution as  
765 implemented in RELION<sup>63</sup>.

766 **f.** Fourier shell correlation plots of the maps used for model building of the RSC core complex.  
767

768 **Extended Data Figure 4 | Cryo-EM densities for selected RSC regions. Related to Figures**  
769 **1 – 4.**

770 **a-c.** Examples of map quality. Close-up of the Rsc4  $\beta$ -sheet shows clear separation of individual  
771 strands (a). The high quality of the map for the ZZ zinc finger of Rsc8 allowed backbone tracing  
772 and placement of side chains as well as for the zinc ion (b). Coiled coil helices of the two Rsc8  
773 subunits with density for one helix (c).

774 **d.** View along the exit DNA in the direction of the nucleosome showing the low pass-filtered  
775 maps for the modules ATPase, ARP, DIM, arm, body, and the nucleosome. At the site where  
776 the H2A C-terminal tail protrudes from the nucleosome, low resolution density connecting the  
777 arm module and the nucleosome is visible. Density bridging from the ARP module to the exit  
778 DNA close to the H3 histone tail can be observed.

779 **e.** Density representing the finger helix (green) at the acidic patch of the nucleosome (indicated  
780 by H2A in yellow). Side chain density is visible for conserved arginine residues.

781 **f.** Interaction of RSC with the nucleosome is sterically impaired by H2B ubiquitylation at K120.  
782 The Sfh1 finger helix and the ubiquitin moiety (ubiquitylated nucleosome PDB code 6NOG)<sup>89</sup>  
783 overlap after superposition of nucleosomes.  
784

785 **Extended Data Figure 5 | Course of polypeptide chains of architectural subunits Sth1,**  
786 **Rsc8 and Rsc58. Related to Figure 1.**

787 **a.** The Sth1 subunit of RSC starts with its N-terminus in the body module and tracks through it  
788 turning around with a contact helix and loop. Forming the central helix I, the hook and the  
789 central helix II it folds back and forth tightly interweaving the body module before it exits with  
790 its HSA region through the ARP module to build the ATPase module.

791 **b.** Back view of the RSC remodeller with the domains of the two Rsc8 subunits highlighted in  
792 blue. Both Rsc8 start N-terminal with their SWIRM domains in the arm module where they  
793 support the two repeat domains of Sfh1 in a similar manner. They then follow distinct paths  
794 through the arm towards the body module where they contribute with both their SANT and ZZ  
795 zinc finger domains. Here the two domains of each subunit form different contacts with various  
796 interaction partners and whereas one ZZ zinc finger domain is tightly packed at the body and  
797 DNA-interaction module interface, the other seems to extend from the body, presumably as

Wagner et al., RSC-nucleosome complex structure

798 additional interaction surface. Both Rsc8 subunits unite again with their C-terminal long helices  
799 in a coiled coil fold in on the opposite side of the body module.

800 c. Rsc58 N-terminal bromodomain attaches to the top of the body module. Then, Rsc58 follows  
801 an interwound path through the body module via the central and connector loop. It turns back  
802 docking to the body with a 3-helix bundle and stabilizing the module with its C-terminal end.

803

804 **Extended Data Figure 6 | Sequence alignments for the Sth1 ATPase domain and HSA**  
805 **region. Related to Figures 1 – 6.**

806 **a.** Sequence alignment of the *S. cerevisiae* Sth1 ATPase domain to the homologous Snf2  
807 ATPase domain of the same organism. Secondary structure elements are represented in red  
808 according to the cryo-EM structure of the Snf2 ATPase (PDB entry 5Z3U)<sup>24</sup>. Residues  
809 modelled in the Snf2 structure are topped by a back line with helical regions shown as cylinders  
810 and sheet regions as arrows. The Sth1 residues modelled in this work are indicated with a black  
811 dashed line below. ATPase motifs are underlined. Invariant residues are coloured in dark blue  
812 and conserved residues in light blue. The alignment was generated with MSAProbs<sup>85</sup> within the  
813 MPI Bioinformatics Toolkit<sup>77</sup> and visualized using ESPrpt<sup>90</sup>.

814 **b.** Sequence alignment of the HSA regions from *S. cerevisiae* homologs Sth1 and Snf2.  
815 Illustration and generation of the alignment as in (a).

816

817 **EXTENDED DATA TABLES**

818

819 **Extended Data Table 1 | Subunit composition of RSC and related chromatin remodelling**  
820 **complexes.** Assignment to the structural modules based on the *S. cerevisiae* structure of RSC  
821 presented in this work. Subunits occurring together in the complex are separated by comma, a  
822 slash indicates the use of one of the subunits. Subunits that could not be assigned to any module  
823 by homology are listed below. PBAF subunits contain 12 DNA-binding domains located in  
824 subunits BAF180 (HMG box)<sup>91</sup>, BAF200 (AT-rich domain, two C2H2 zinc fingers, RFX  
825 domain)<sup>42</sup>, BAF57 (HMG box)<sup>92</sup> and BCL11A/B (six C2H2 zinc fingers)<sup>93</sup>.

826

827 **Extended Data Table 2 | RSC subunit modelling.**

828 Modelling details for the RSC complex. Density that could not be assigned to a subunit was  
829 modelled with a poly alanine backbone in chain X. The domains of the two Rsc8 subunits are  
830 combined in one chain (L) spaced by 1000 amino acid offset.

831

832 **Extended Data Table 3 | Cryo-EM data collection, refinement, and validation statistics.**

833

834 **Supplementary Table S1 | RSC-nucleosome cross-links**

835 List of intra- and inter-subunit lysine-lysine crosslinks as identified by LC-MS analyses and  
836 subsequent database search using pLink 2. The respective scores of cross-link identification are  
837 listed as well as the number of CSMs (cross-linked spectra matches).

838

839 **Supplementary Video 1 | Overview of RSC structure.**

840 The video shows the structure of RSC rotating around a vertical axis. It first depicts the low  
841 pass-filtered cryo-EM density, showing the five lobes of RSC and the nucleosome with exit  
842 DNA extending from it. It then shows the high-resolution cryo-EM maps for RSC modules,  
843 and finally the structural model as a ribbon representation with subunits in different colours  
844 (colour code as in Figure 1).

845

846

847

848 **METHODS AND EXTENDED DATA REFERENCES**

- 849 53 Cairns, B. R. *et al.* Two functionally distinct forms of the RSC nucleosome-remodeling  
850 complex, containing essential AT hook, BAH, and bromodomains. *Mol Cell* **4**, 715-723  
851 (1999).
- 852 54 Rigaut, G. *et al.* A generic protein purification method for protein complex  
853 characterization and proteome exploration. *Nat Biotechnol* **17**, 1030-1032,  
854 doi:10.1038/13732 (1999).
- 855 55 Lorch, Y. & Kornberg, R. D. Isolation and assay of the RSC chromatin-remodeling  
856 complex from *Saccharomyces cerevisiae*. *Methods Enzymol* **377**, 316-322,  
857 doi:10.1016/S0076-6879(03)77019-0 (2004).
- 858 56 Luger, K., Rechsteiner, T. J. & Richmond, T. J. Expression and purification of  
859 recombinant histones and nucleosome reconstitution. *Methods Mol Biol* **119**, 1-16,  
860 doi:10.1385/1-59259-681-9:1 (1999).
- 861 57 Dyer, P. N. *et al.* in *Methods in Enzymology* Vol. 375 23-44 (Academic Press, 2003).
- 862 58 Maskell, D. P. *et al.* Structural basis for retroviral integration into nucleosomes. *Nature*  
863 **523**, 366-369, doi:10.1038/nature14495 (2015).
- 864 59 Lowary, P. T. & Widom, J. New DNA sequence rules for high affinity binding to histone  
865 octamer and sequence-directed nucleosome positioning. *J Mol Biol* **276**, 19-42,  
866 doi:10.1006/jmbi.1997.1494 (1998).
- 867 60 Kastner, B. *et al.* GraFix: sample preparation for single-particle electron  
868 cryomicroscopy. *Nat Methods* **5**, 53-55, doi:10.1038/nmeth1139 (2008).
- 869 61 Stark, H. GraFix: stabilization of fragile macromolecular complexes for single particle  
870 cryo-EM. *Methods Enzymol* **481**, 109-126, doi:10.1016/S0076-6879(10)81005-5  
871 (2010).
- 872 62 Tegunov, D. & Cramer, P. Real-time cryo-EM data pre-processing with Warp. *bioRxiv*  
873 (2018).
- 874 63 Zivanov, J. *et al.* New tools for automated high-resolution cryo-EM structure  
875 determination in RELION-3. *Elife* **7**, doi:10.7554/eLife.42166 (2018).
- 876 64 Pettersen, E. F. *et al.* UCSF Chimera--a visualization system for exploratory research  
877 and analysis. *J Comput Chem* **25**, 1605-1612, doi:10.1002/jcc.20084 (2004).
- 878 65 Emsley, P., Lohkamp, B., Scott, W. G. & Cowtan, K. Features and development of Coot.  
879 *Acta Crystallogr D Biol Crystallogr* **66**, 486-501, doi:10.1107/S0907444910007493  
880 (2010).
- 881 66 Kidmose, R. T. *et al.* Namdinator - automatic molecular dynamics flexible fitting of  
882 structural models into cryo-EM and crystallography experimental maps. *IUCrJ* **6**, 526-  
883 531, doi:10.1107/S2052252519007619 (2019).
- 884 67 Adams, P. D. *et al.* PHENIX: a comprehensive Python-based system for macromolecular  
885 structure solution. *Acta Crystallogr D Biol Crystallogr* **66**, 213-221,  
886 doi:10.1107/S0907444909052925 (2010).
- 887 68 Song, Y. *et al.* High-resolution comparative modeling with RosettaCM. *Structure* **21**,  
888 1735-1742, doi:10.1016/j.str.2013.08.005 (2013).
- 889 69 Raman, S. *et al.* Structure prediction for CASP8 with all-atom refinement using Rosetta.  
890 *Proteins* **77 Suppl 9**, 89-99, doi:10.1002/prot.22540 (2009).
- 891 70 van Dijk, M. & Bonvin, A. M. 3D-DART: a DNA structure modelling server. *Nucleic Acids*  
892 *Res* **37**, W235-239, doi:10.1093/nar/gkp287 (2009).
- 893 71 Bienert, S. *et al.* The SWISS-MODEL Repository-new features and functionality. *Nucleic*  
894 *Acids Res* **45**, D313-D319, doi:10.1093/nar/gkw1132 (2017).

Wagner et al., RSC-nucleosome complex structure

- 895 72 Charlop-Powers, Z., Zeng, L., Zhang, Q. & Zhou, M. M. Structural insights into selective  
896 histone H3 recognition by the human Polybromo bromodomain 2. *Cell Res* **20**, 529-  
897 538, doi:10.1038/cr.2010.43 (2010).
- 898 73 Da, G. *et al.* Structure and function of the SWIRM domain, a conserved protein module  
899 found in chromatin regulatory complexes. *Proc Natl Acad Sci U S A* **103**, 2057-2062,  
900 doi:10.1073/pnas.0510949103 (2006).
- 901 74 Legge, G. B. *et al.* ZZ domain of CBP: an unusual zinc finger fold in a protein interaction  
902 module. *J Mol Biol* **343**, 1081-1093, doi:10.1016/j.jmb.2004.08.087 (2004).
- 903 75 Reichen, C. *et al.* Structures of designed armadillo-repeat proteins show propagation  
904 of inter-repeat interface effects. *Acta Crystallogr D Struct Biol* **72**, 168-175,  
905 doi:10.1107/S2059798315023116 (2016).
- 906 76 Grimm, M., Zimniak, T., Kahraman, A. & Herzog, F. xVis: a web server for the schematic  
907 visualization and interpretation of crosslink-derived spatial restraints. *Nucleic Acids*  
908 *Res* **43**, W362-369, doi:10.1093/nar/gkv463 (2015).
- 909 77 Zimmermann, L. *et al.* A Completely Reimplemented MPI Bioinformatics Toolkit with a  
910 New HHpred Server at its Core. *J Mol Biol* **430**, 2237-2243,  
911 doi:10.1016/j.jmb.2017.12.007 (2018).
- 912 78 Buchan, D. W. A. & Jones, D. T. The PSIPRED Protein Analysis Workbench: 20 years on.  
913 *Nucleic Acids Res* **47**, W402-W407, doi:10.1093/nar/gkz297 (2019).
- 914 79 Jones, D. T. Protein secondary structure prediction based on position-specific scoring  
915 matrices. *J Mol Biol* **292**, 195-202, doi:10.1006/jmbi.1999.3091 (1999).
- 916 80 Williams, C. J. *et al.* MolProbity: More and better reference data for improved all-atom  
917 structure validation. *Protein Sci* **27**, 293-315, doi:10.1002/pro.3330 (2018).
- 918 81 Schrodinger, LLC. *The PyMOL Molecular Graphics System, Version 1.8* (2015).
- 919 82 Goddard, T. D. *et al.* UCSF ChimeraX: Meeting modern challenges in visualization and  
920 analysis. *Protein Sci* **27**, 14-25, doi:10.1002/pro.3235 (2018).
- 921 83 Cerami, E. *et al.* The cBio cancer genomics portal: an open platform for exploring  
922 multidimensional cancer genomics data. *Cancer Discov* **2**, 401-404, doi:10.1158/2159-  
923 8290.CD-12-0095 (2012).
- 924 84 Gao, J. *et al.* Integrative analysis of complex cancer genomics and clinical profiles using  
925 the cBioPortal. *Sci Signal* **6**, pl1, doi:10.1126/scisignal.2004088 (2013).
- 926 85 Liu, Y., Schmidt, B. & Maskell, D. L. MSAProbs: multiple sequence alignment based on  
927 pair hidden Markov models and partition function posterior probabilities.  
928 *Bioinformatics* **26**, 1958-1964, doi:10.1093/bioinformatics/btq338 (2010).
- 929 86 Bond, C. S. & Schuttelkopf, A. W. ALINE: a WYSIWYG protein-sequence alignment  
930 editor for publication-quality alignments. *Acta Crystallogr D Biol Crystallogr* **65**, 510-  
931 512, doi:10.1107/S0907444909007835 (2009).
- 932 87 Yang, B. *et al.* Identification of cross-linked peptides from complex samples. *Nat*  
933 *Methods* **9**, 904-906, doi:10.1038/nmeth.2099 (2012).
- 934 88 Combe, C. W., Fischer, L. & Rappsilber, J. xiNET: cross-link network maps with residue  
935 resolution. *Mol Cell Proteomics* **14**, 1137-1147, doi:10.1074/mcp.O114.042259 (2015).
- 936 89 Worden, E. J., Hoffmann, N. A., Hicks, C. W. & Wolberger, C. Mechanism of Cross-talk  
937 between H2B Ubiquitination and H3 Methylation by Dot1L. *Cell* **176**, 1490-1501 e1412,  
938 doi:10.1016/j.cell.2019.02.002 (2019).
- 939 90 Robert, X. & Gouet, P. Deciphering key features in protein structures with the new  
940 ENDscript server. *Nucleic Acids Res* **42**, W320-324, doi:10.1093/nar/gku316 (2014).
- 941 91 Nicolas, R. H. & Goodwin, G. H. Molecular cloning of polybromo, a nuclear protein  
942 containing multiple domains including five bromodomains, a truncated HMG-box, and

Wagner et al., RSC-nucleosome complex structure

- 943 two repeats of a novel domain. *Gene* **175**, 233-240, doi:10.1016/0378-1119(96)82845-  
944 9 (1996).
- 945 92 Wang, W. *et al.* Architectural DNA binding by a high-mobility-group/kinesin-like  
946 subunit in mammalian SWI/SNF-related complexes. *Proc Natl Acad Sci U S A* **95**, 492-  
947 498, doi:10.1073/pnas.95.2.492 (1998).
- 948 93 Satterwhite, E. *et al.* The BCL11 gene family: involvement of BCL11A in lymphoid  
949 malignancies. *Blood* **98**, 3413-3420, doi:10.1182/blood.v98.12.3413 (2001).
- 950



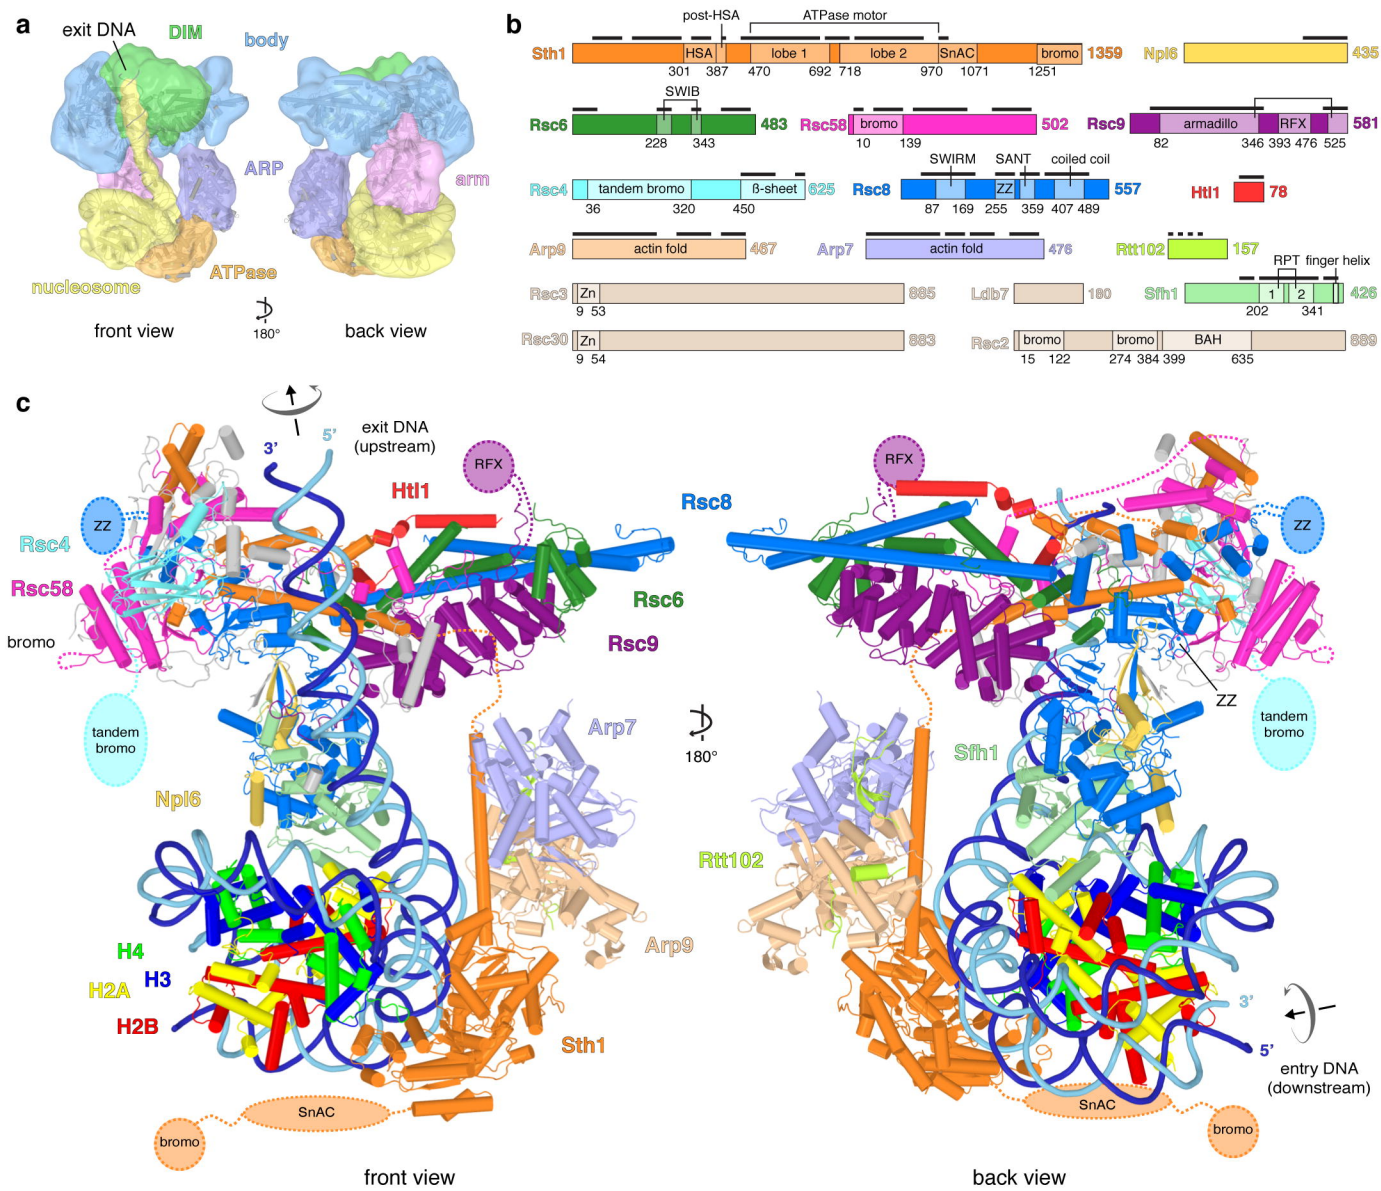

Wagner et al., Figure 1

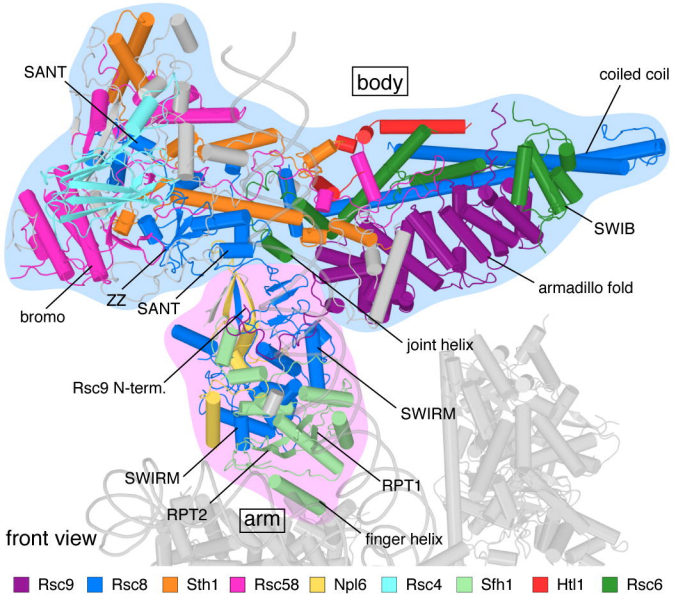

Wagner et al., Figure 2

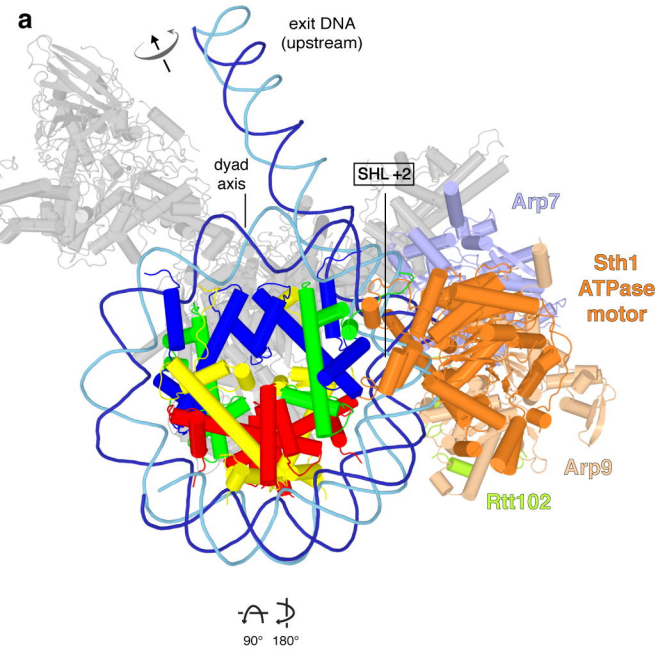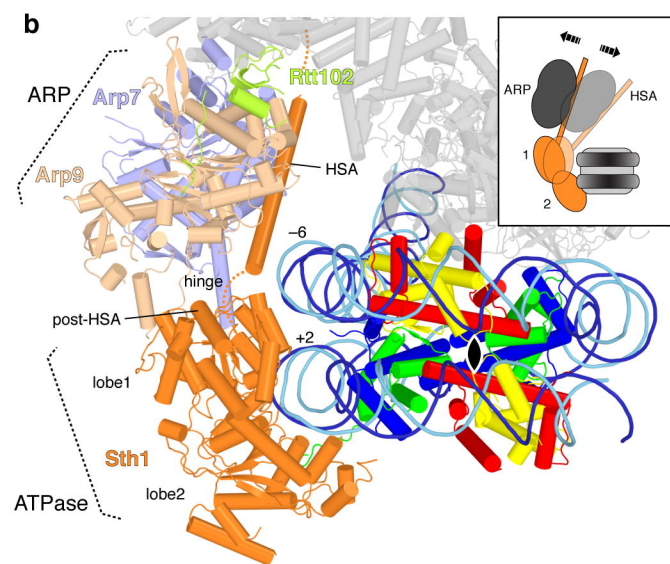

Wagner et al., Figure 3

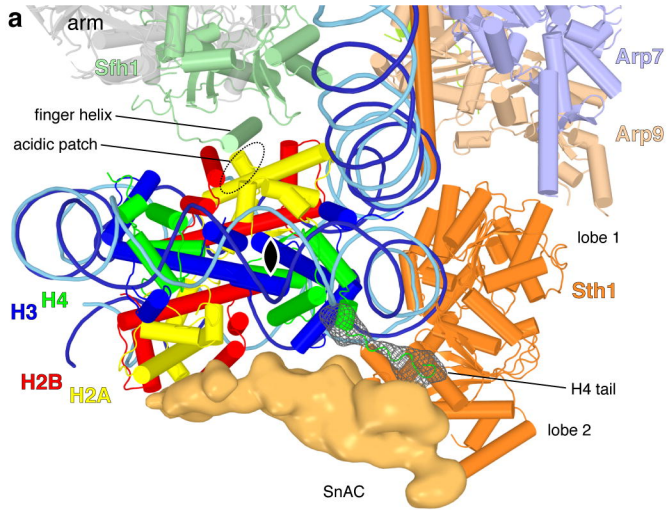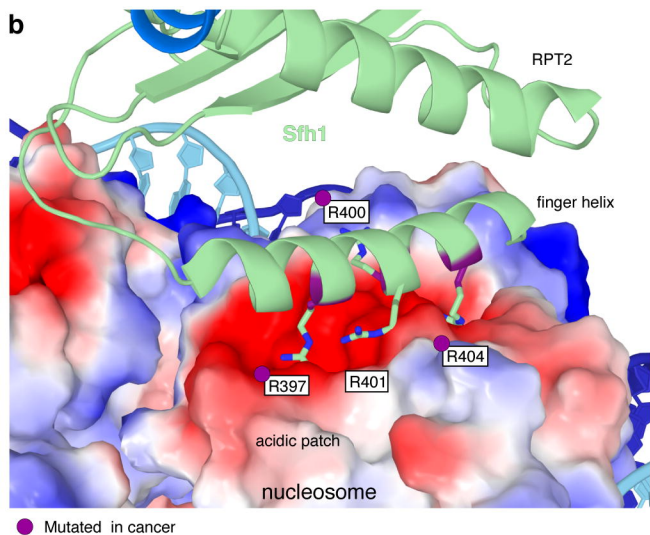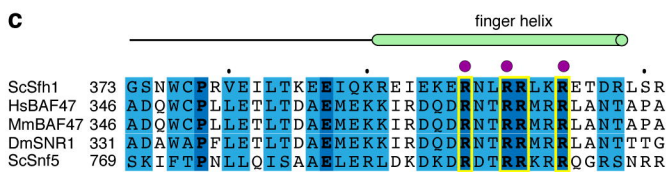

Wagner et al., Figure 4

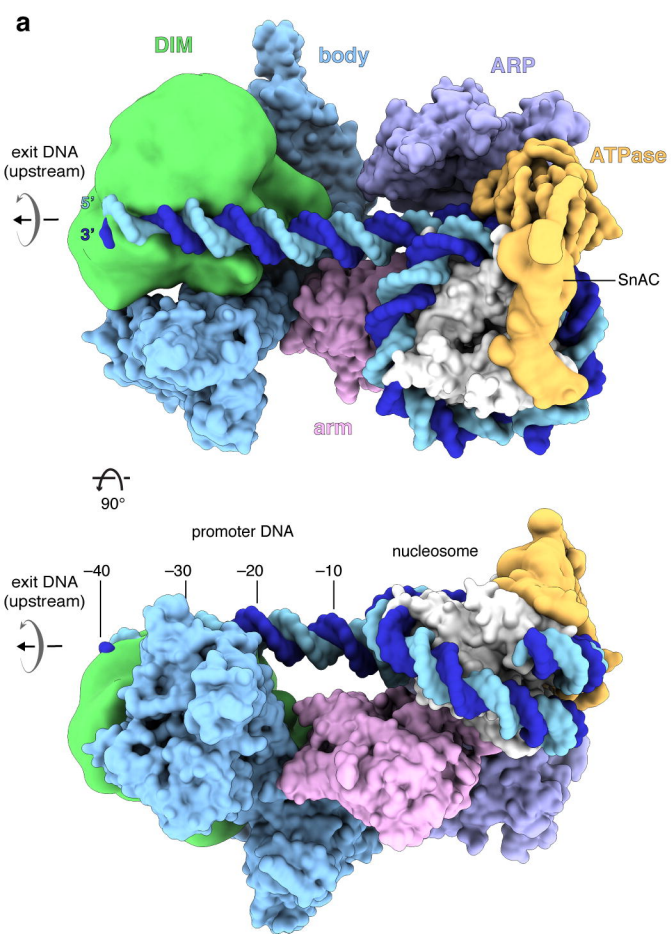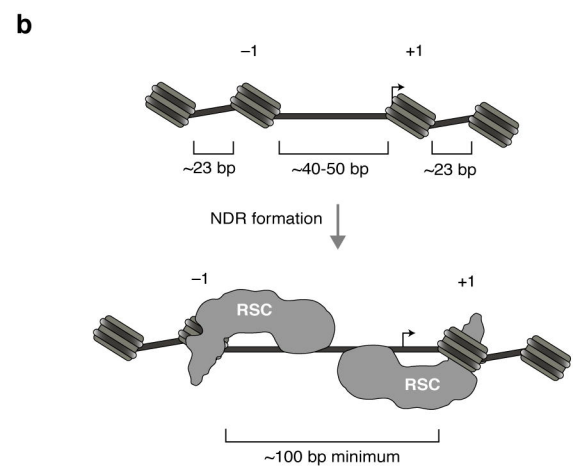

Wagner et al., Figure 5

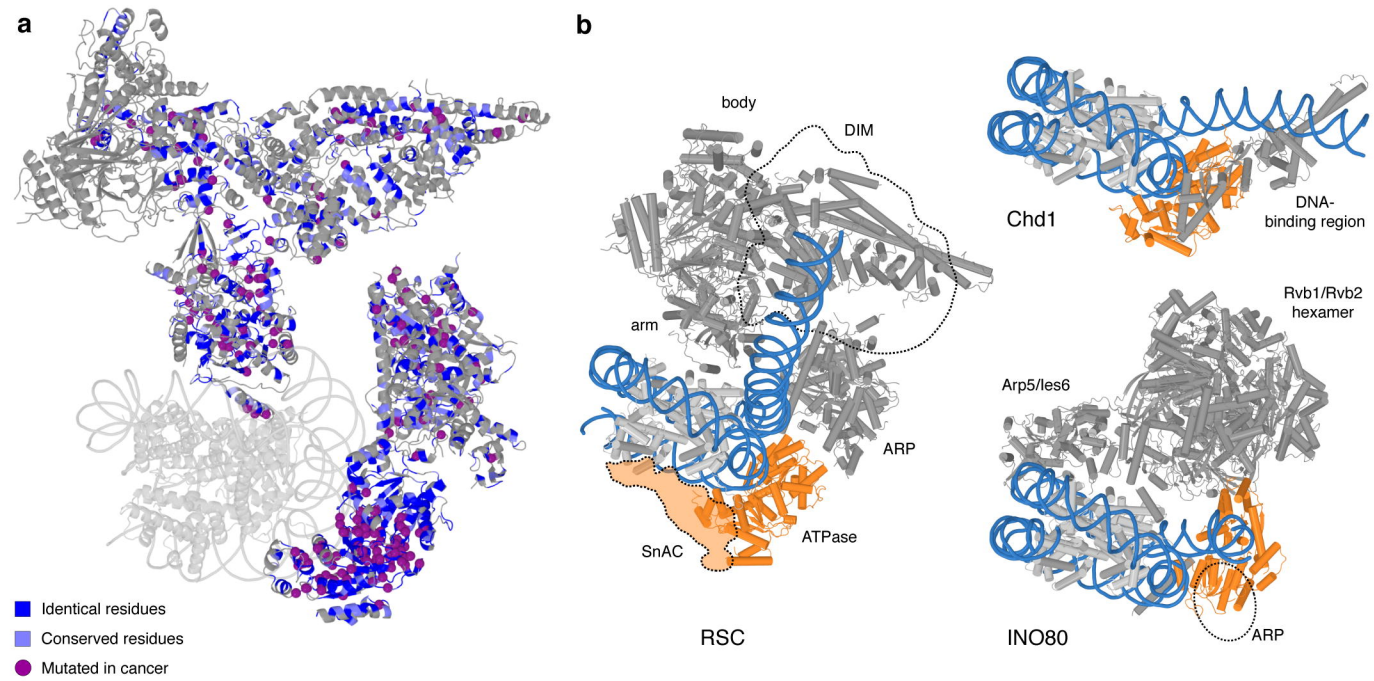

Wagner et al., Figure 6

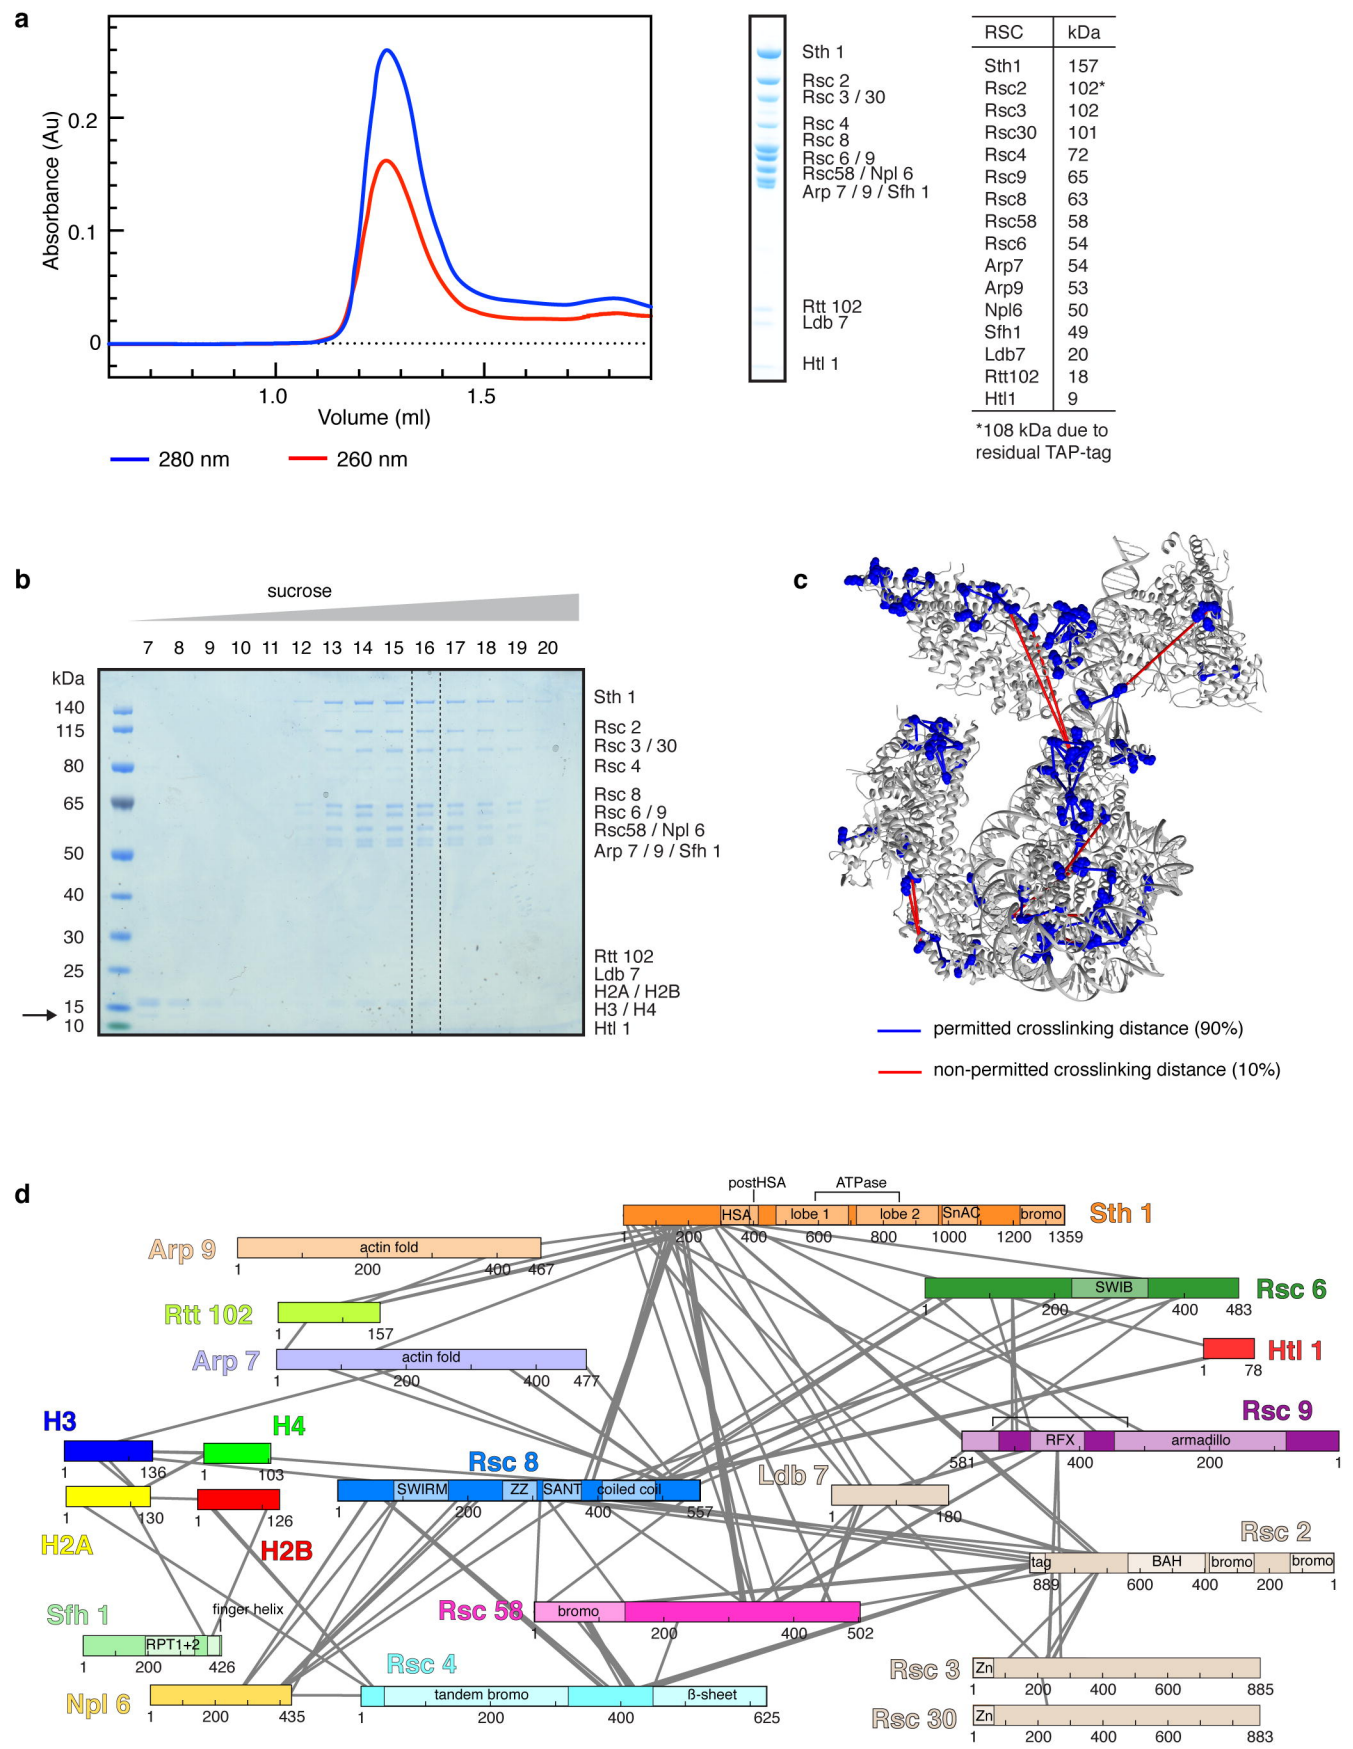

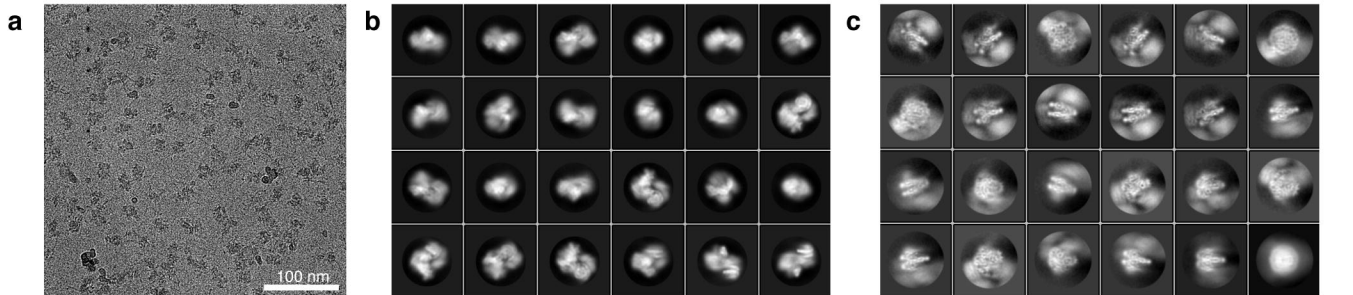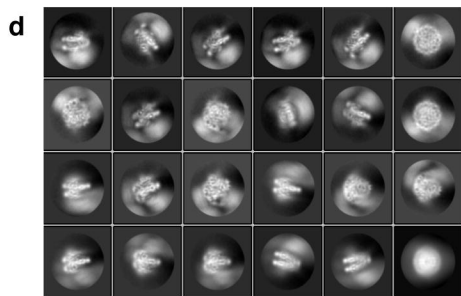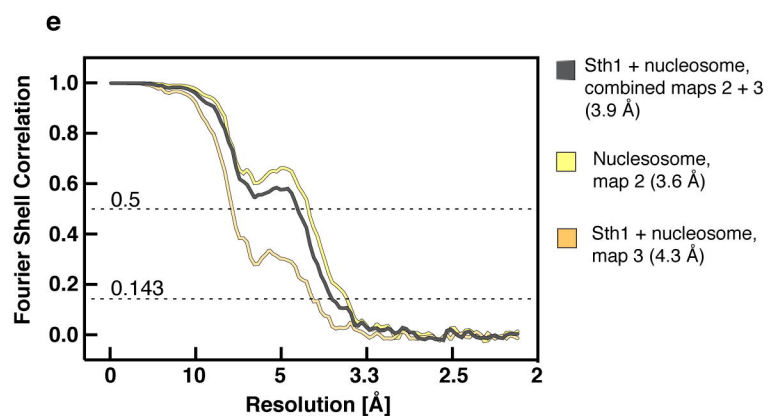

**f** 1,232,532 autopicked particles  Initial reference from neg. stain data filtered to 60 Å

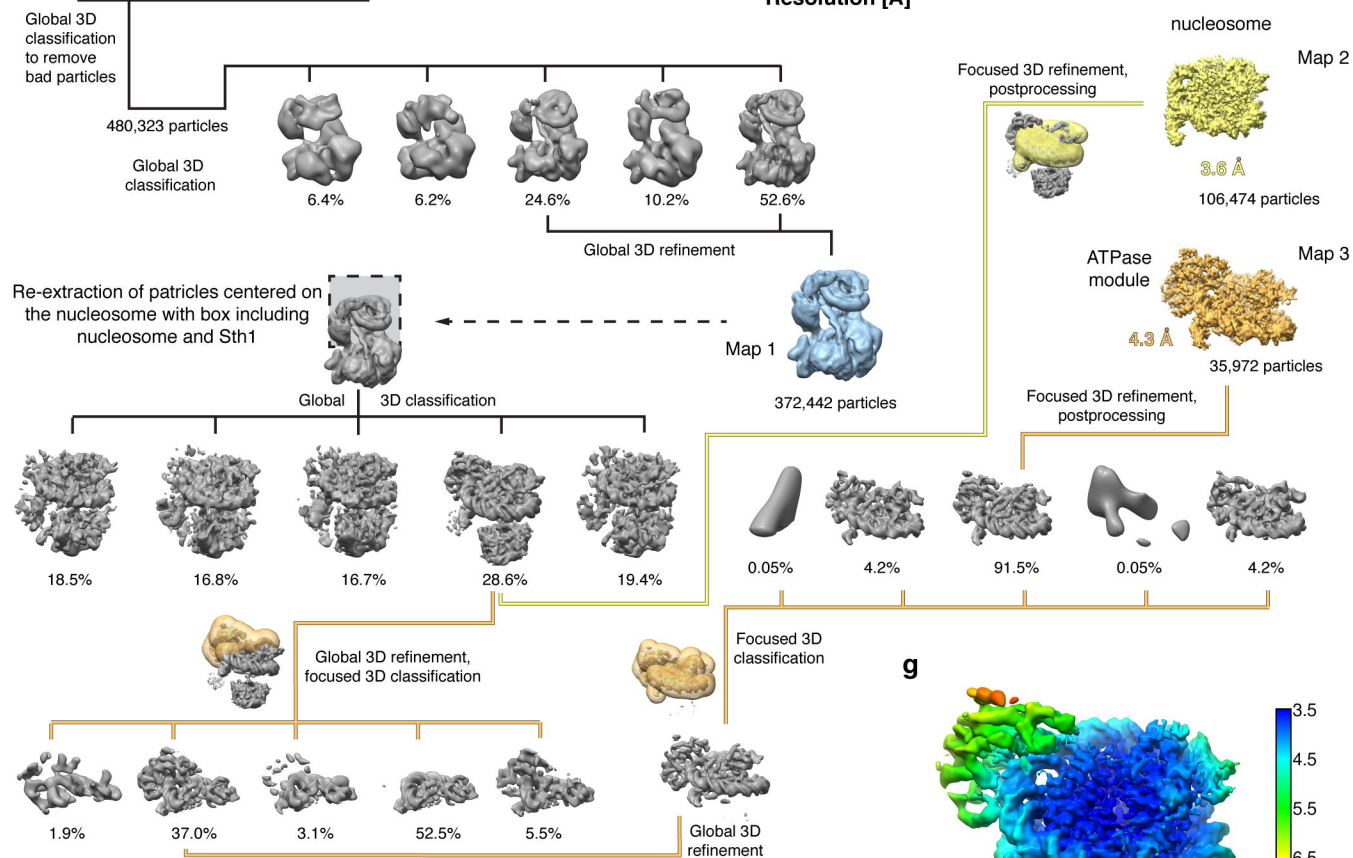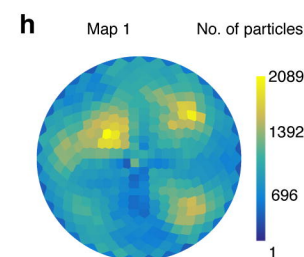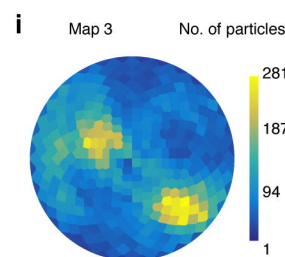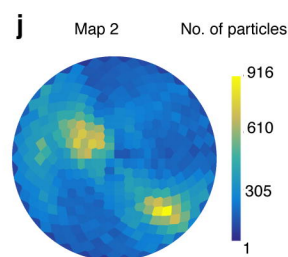



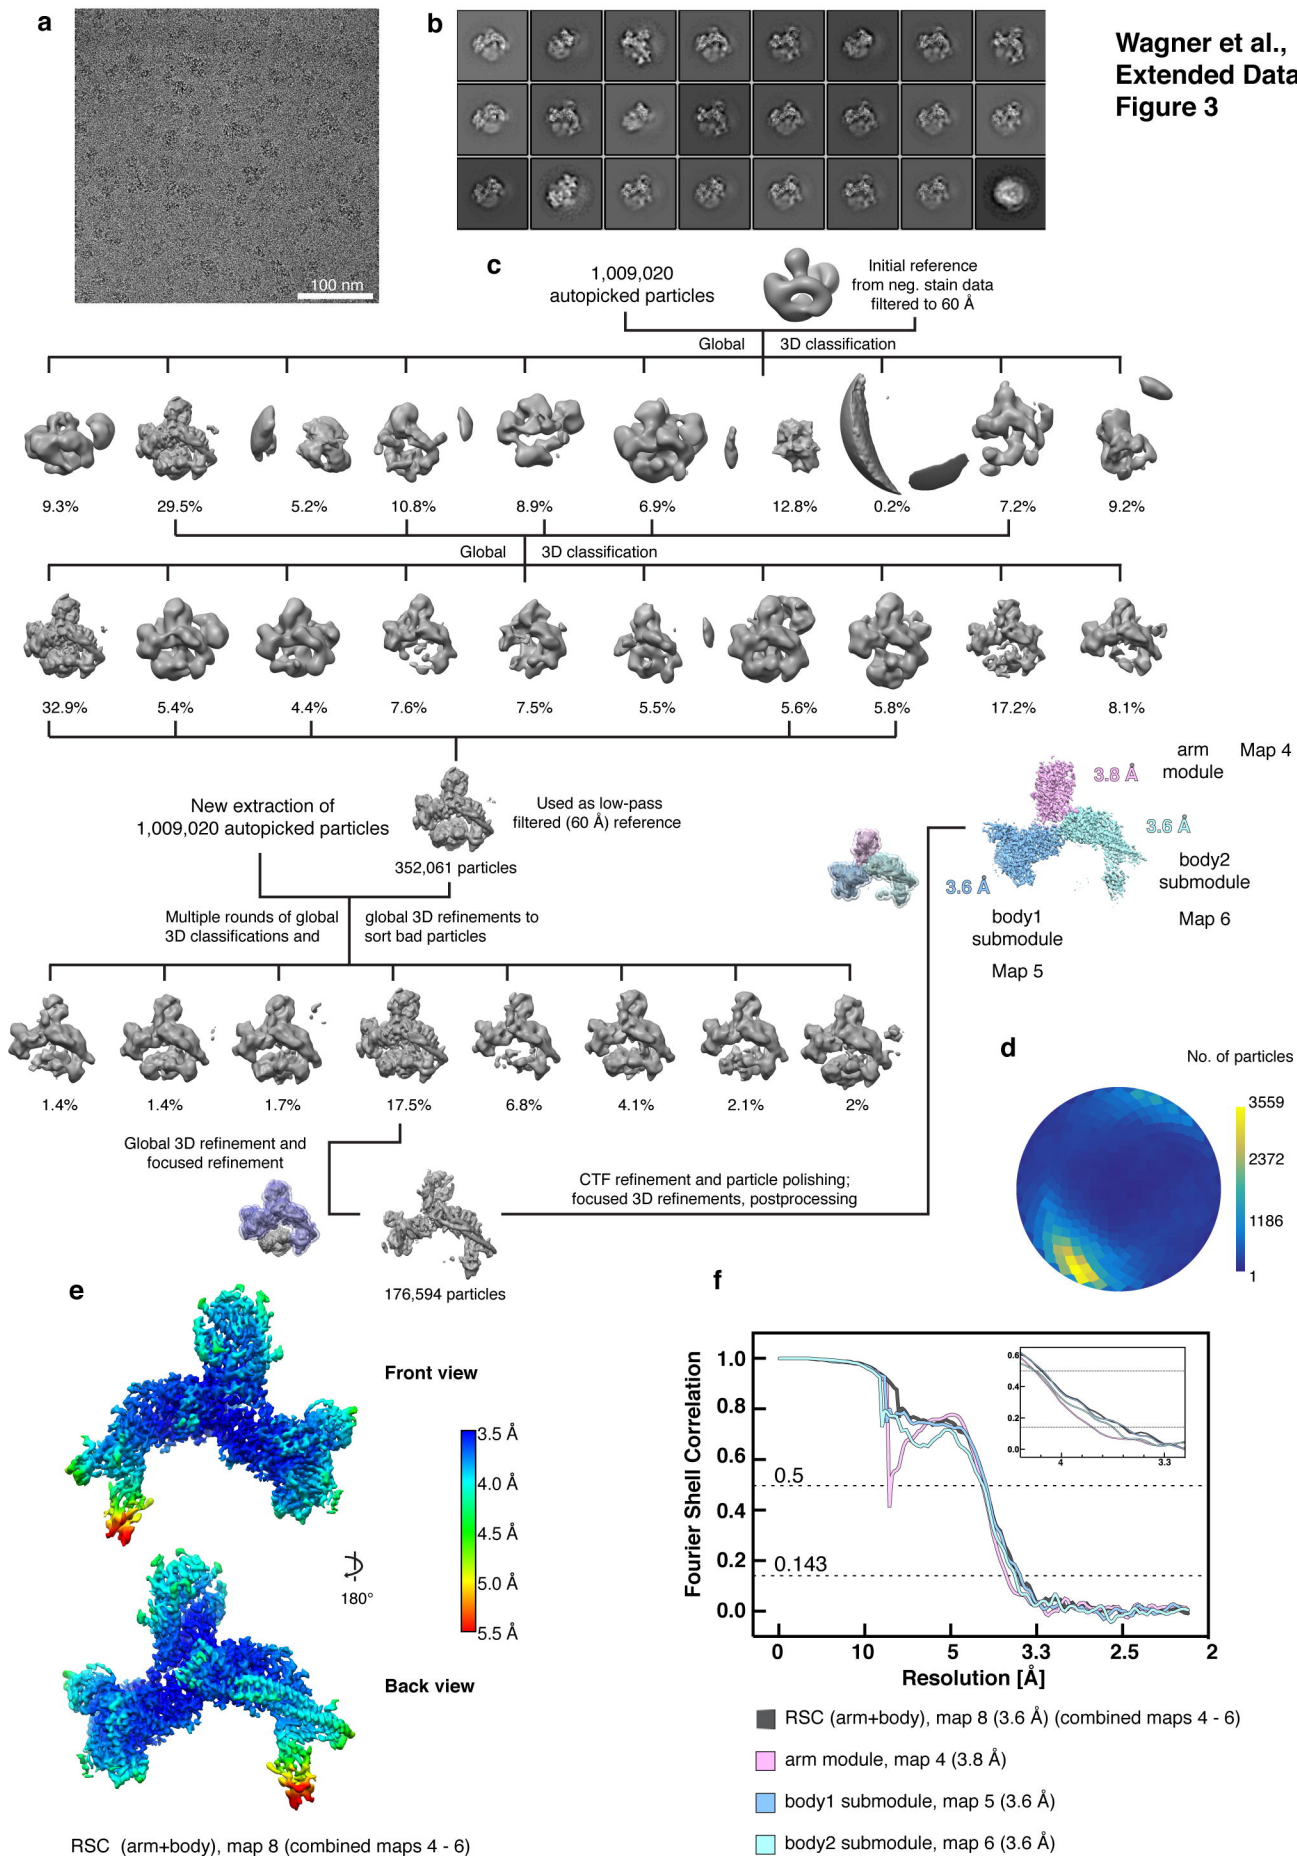

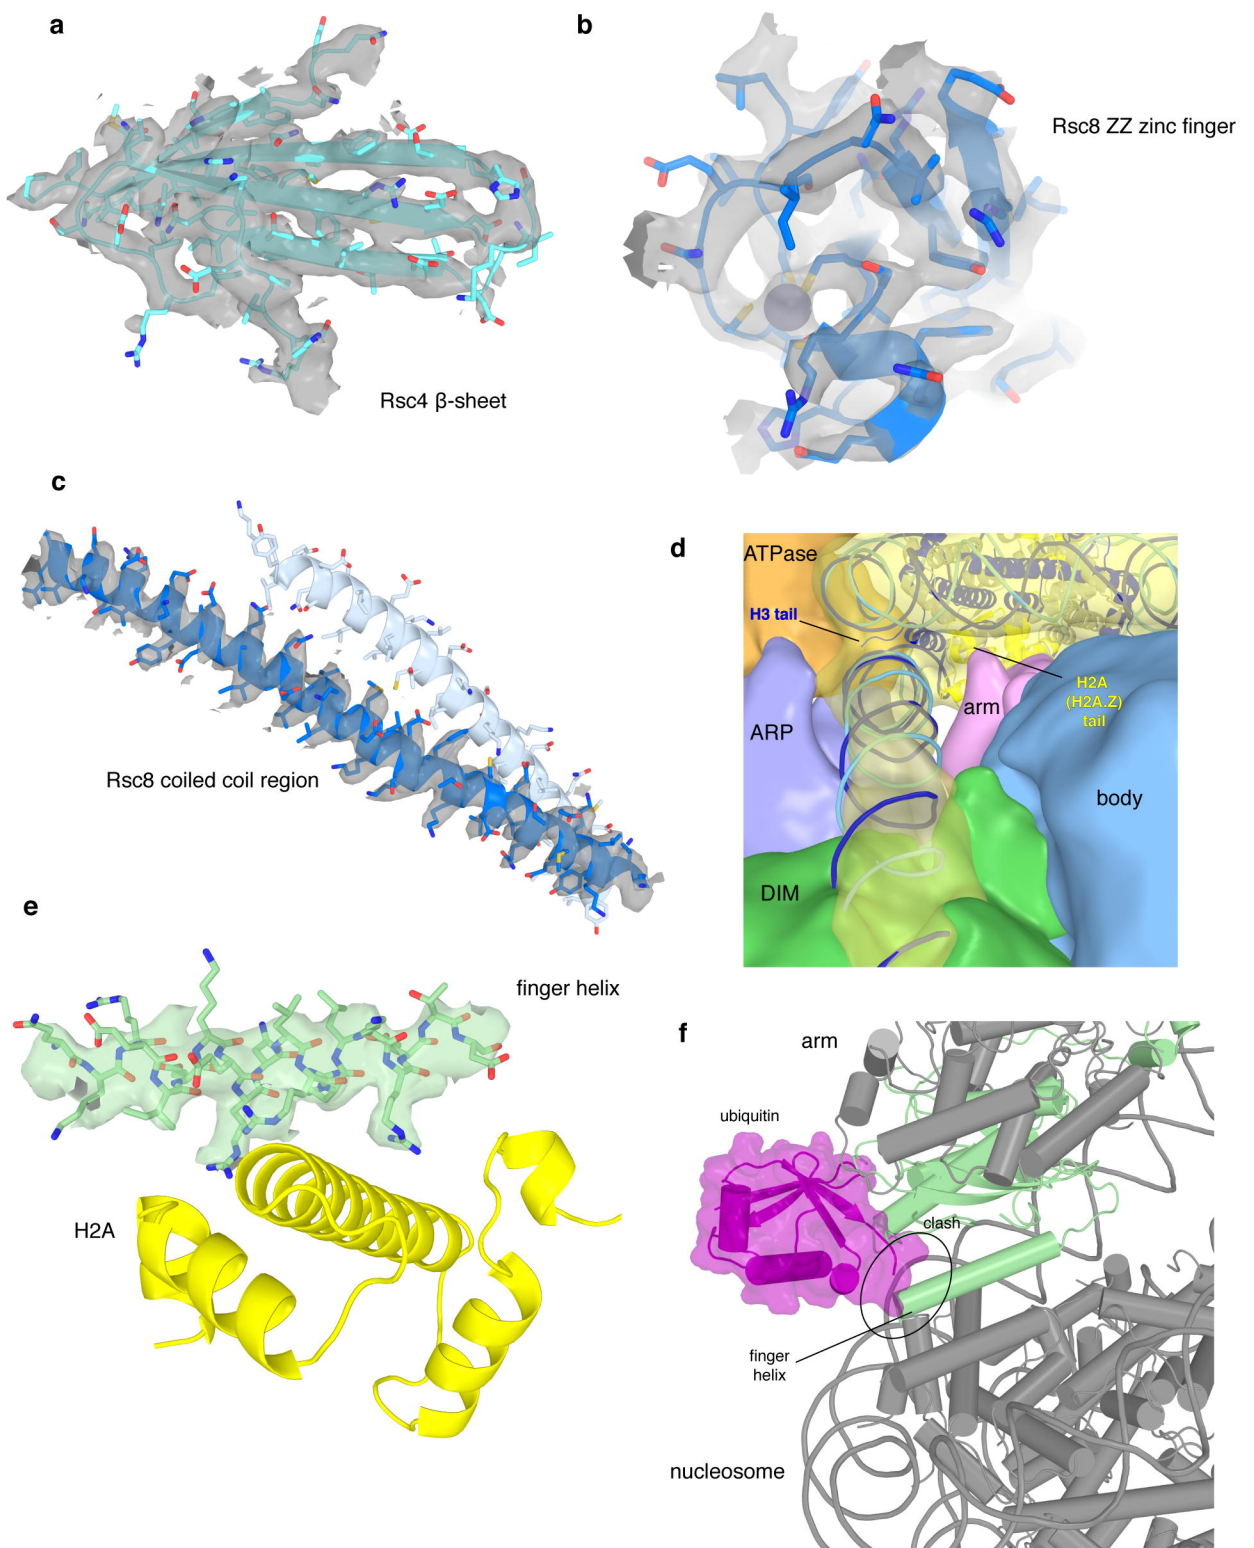

Wagner et al., Extended Data Figure 4

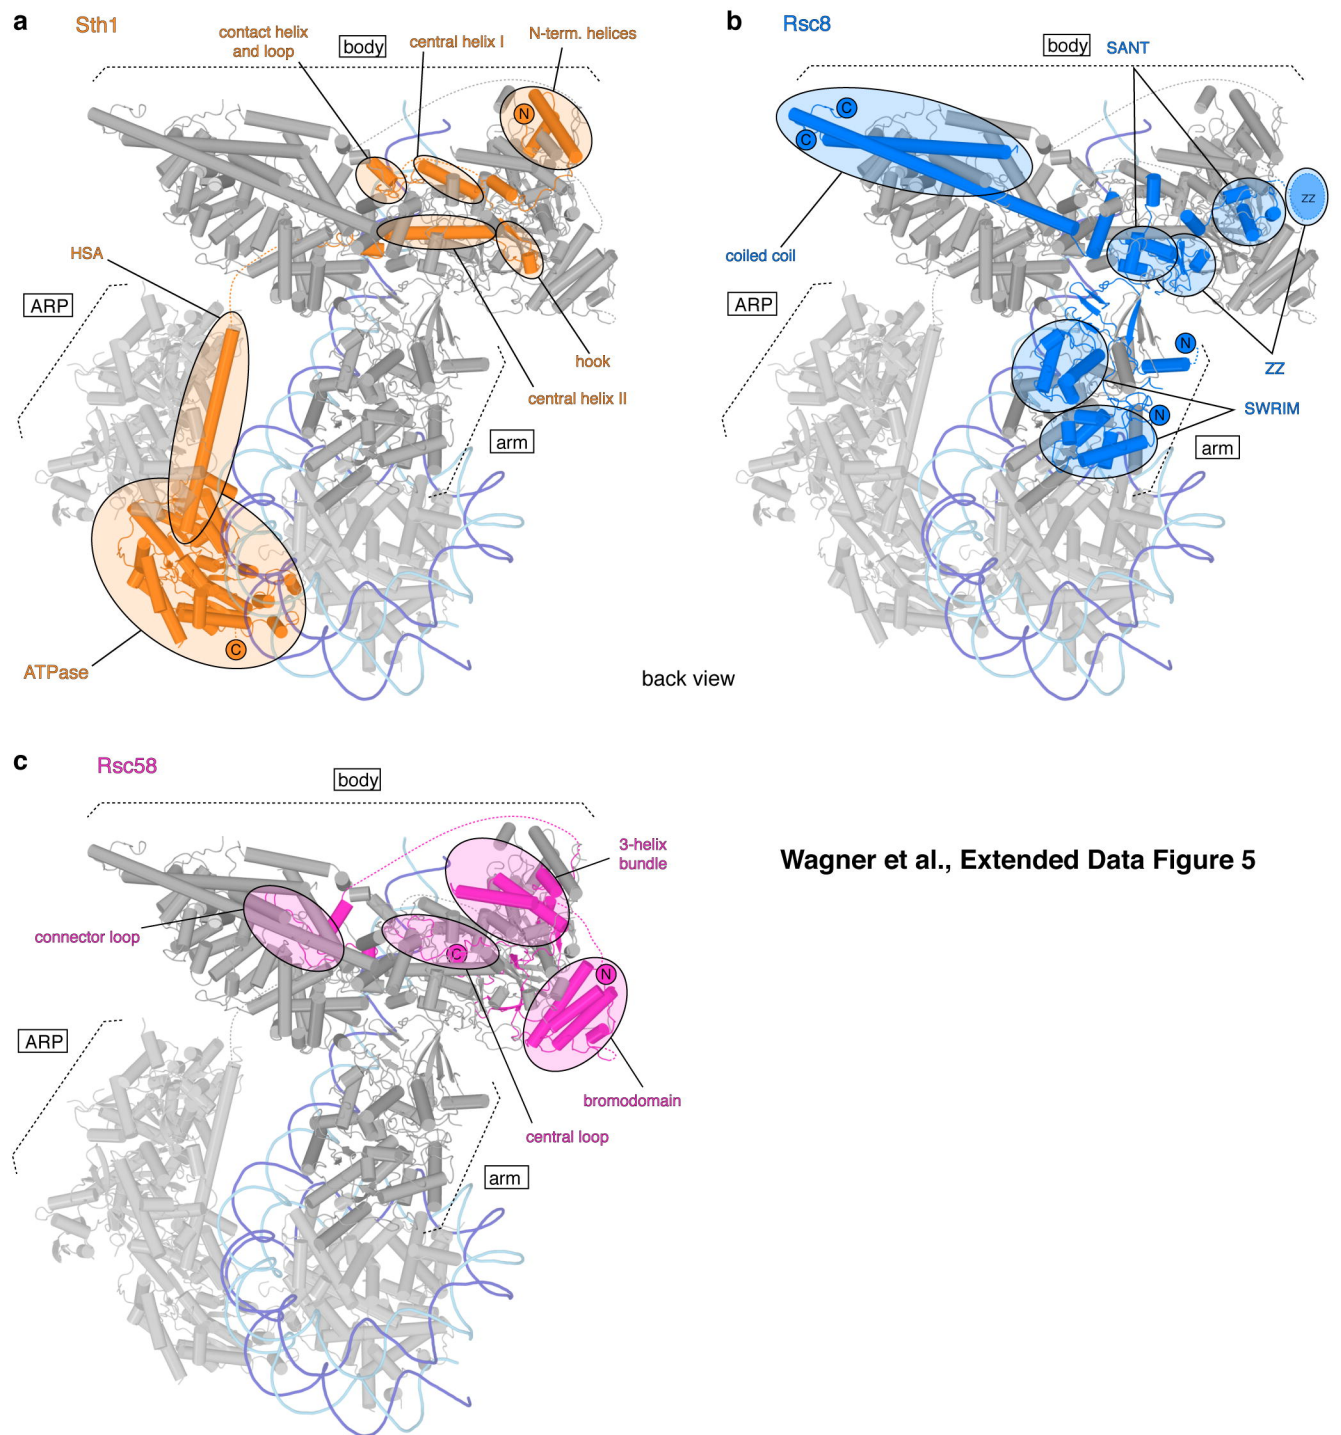

Wagner et al., Extended Data Figure 5

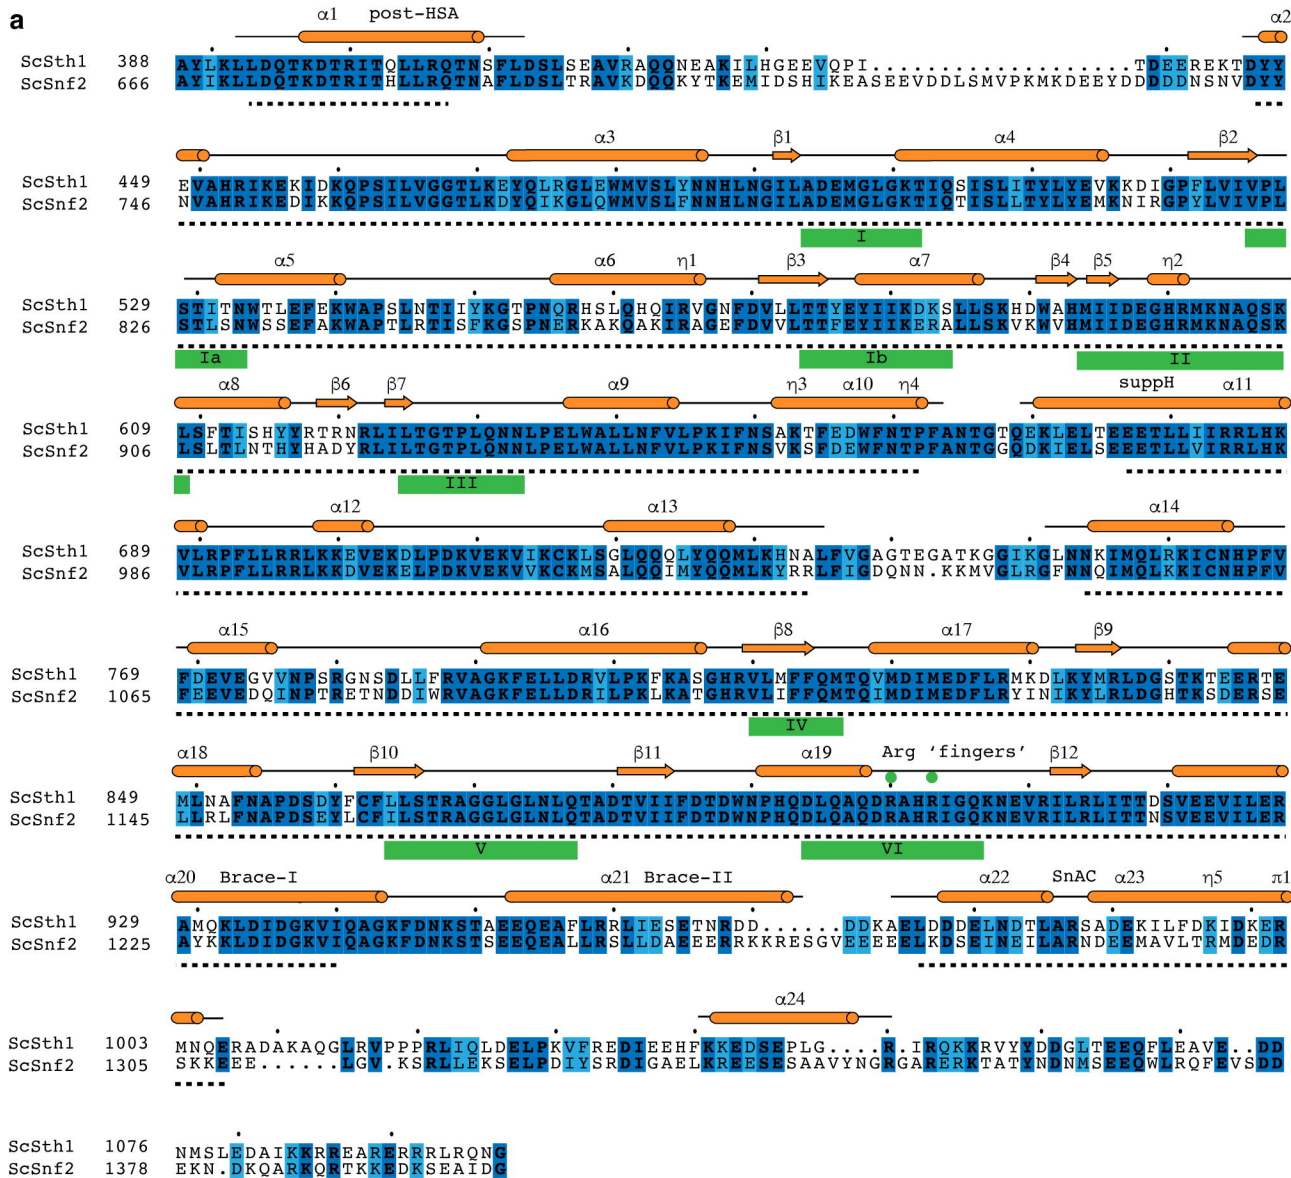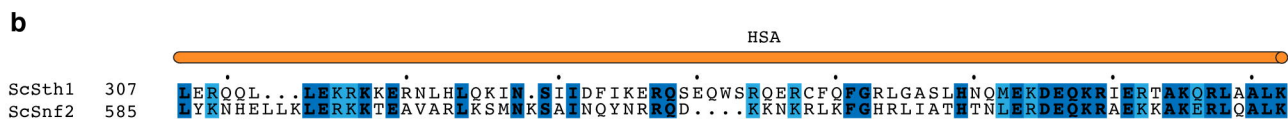

Wagner et al., Extended Data Figure 6

## Extended Data Table 1 | Subunit composition of RSC and related chromatin remodelling complexes.

| Module                        | <i>S. cerevisiae</i> |            | <i>S. pombe</i> |            | <i>D. melanogaster</i> |                | <i>H. sapiens</i> |                |
|-------------------------------|----------------------|------------|-----------------|------------|------------------------|----------------|-------------------|----------------|
|                               | RSC                  | SWI/SNF    | RSC             | SWI/SNF    | PBAP                   | BAP            | PBAF              | BAF            |
| <b>ATPase module</b>          | Sth1                 | Snf2       | Snf21           | Snf22      | BRM                    | BRM            | BRG1              | BRG1/BRM       |
| <b>Arp module</b>             | Arp9                 | Arp9       | Arp9            | Arp9       | $\beta$ -actin         | $\beta$ -actin | $\beta$ -actin    | $\beta$ -actin |
|                               | Arp7                 | Arp7       | Arp42           | Arp42      | BAP55                  | BAP55          | BAF53A/B          | BAF53A/B       |
|                               | Rtt102               | Rtt102     |                 |            |                        |                |                   |                |
| <b>arm module</b>             | Sfh1                 | Snf5       | Sfh1            | Snf2       | SNR1                   | SNR1           | BAF47             | BAF47          |
|                               | Npl6                 | Swp82      | Rsc7            | Snf59      |                        |                |                   |                |
| <b>body module</b>            | Rsc6                 | Swp73      | Ssr3            | Ssr3       | BAP60                  | BAP60          | BAF60A/B/C        | BAF60A/B/C     |
|                               | Rsc9                 | Swi1       | Rsc9            | Sol1       | BAP170                 | OSA            | BAF200            | BAF250A/B      |
|                               | Htl1                 |            |                 |            |                        |                |                   |                |
|                               | Rsc58                |            | Rsc58           |            |                        |                |                   |                |
|                               | Rsc4                 |            | Rsc4            |            |                        |                |                   |                |
|                               | Rsc2 / Rsc1          |            | Rsc1            |            | Polybromo              |                | BAF180            |                |
| <b>DNA-interaction module</b> | Rsc3                 |            |                 |            |                        |                |                   |                |
|                               | Rsc30                |            |                 |            |                        |                |                   |                |
| <b>Scaffold</b>               | Rsc8, Rsc8           | Swi3, Swi3 | Ssr1, Ssr2      | Ssr1, Ssr2 | MOR, MOR               | MOR, MOR       | BAF155, BAF170    | BAF155, BAF170 |
|                               | Ldb7                 |            |                 |            |                        |                |                   |                |
|                               |                      |            |                 |            | BAP111                 | BAP111         | BAF57             | BAF57          |
|                               |                      | Snf11      |                 |            |                        |                |                   |                |
|                               |                      | Snf6       |                 |            |                        |                |                   |                |
|                               |                      | Taf14      |                 | Tfg3       |                        |                |                   |                |
|                               |                      |            |                 | Snf30      |                        |                |                   |                |
|                               |                      |            |                 |            | SAYP                   |                | BAF45A            | BAF45A/B/C     |
|                               |                      |            |                 |            |                        |                | BRD7              | BRD9           |
|                               |                      |            |                 |            |                        |                | BCL11A/B          | BCL11A/B       |
|                               |                      |            |                 |            |                        |                | BCL7A/B/C         | BCL7A/B/C      |
|                               |                      |            |                 |            |                        | SS18 / SS18L1  |                   |                |

## Extended Data Table 2 | RSC subunit modelling.

| Subunit / Chain ID | Domain        | Residue range | PDB entry of homology model / Modelling algorithm                                                                                                                                                                                                                                                                                                                                                                                                                   | Changes to homology model                                                                                              |
|--------------------|---------------|---------------|---------------------------------------------------------------------------------------------------------------------------------------------------------------------------------------------------------------------------------------------------------------------------------------------------------------------------------------------------------------------------------------------------------------------------------------------------------------------|------------------------------------------------------------------------------------------------------------------------|
| H2A / C + G        | Histone       | 15-116        | 5Z3U / Used as deposited, without chain O                                                                                                                                                                                                                                                                                                                                                                                                                           | UCSF Chimera, Namdinator, PHENIX real space refinement<br>H4 (B) 15-22 stubbed<br>Removed residues (see residue range) |
| H2B / D + H        |               | 15-116        |                                                                                                                                                                                                                                                                                                                                                                                                                                                                     |                                                                                                                        |
| H3 / A + E         | Histone       | 30-121        |                                                                                                                                                                                                                                                                                                                                                                                                                                                                     |                                                                                                                        |
| H4 / B + F         |               | 30-121        |                                                                                                                                                                                                                                                                                                                                                                                                                                                                     |                                                                                                                        |
| DNA / I            | Nucl. DNA     | 39-134        |                                                                                                                                                                                                                                                                                                                                                                                                                                                                     |                                                                                                                        |
| DNA / J            | Nucl. DNA     | 40-134        |                                                                                                                                                                                                                                                                                                                                                                                                                                                                     |                                                                                                                        |
| DNA / I            | Upstream DNA  | 15-101        |                                                                                                                                                                                                                                                                                                                                                                                                                                                                     |                                                                                                                        |
| DNA / J            |               | 21-102        |                                                                                                                                                                                                                                                                                                                                                                                                                                                                     |                                                                                                                        |
| DNA / I            | Nucl. DNA     | 2-124         | B-DNA / 3D-DART                                                                                                                                                                                                                                                                                                                                                                                                                                                     | UCSF Chimera, PHENIX geometry minimization                                                                             |
| DNA / J            | Nucl. DNA     | 24-146        |                                                                                                                                                                                                                                                                                                                                                                                                                                                                     |                                                                                                                        |
| DNA / I            | Upstream DNA  | -35-1         | not modelled<br>COOT, density guided <i>de novo</i> modelling<br>not modelled<br>COOT, density guided <i>de novo</i> modelling<br>6ax5 / SWISS<br>COOT, density guided <i>de novo</i> modelling<br>6ax5 / SWISS<br>COOT, density guided <i>de novo</i> modelling<br>COOT, density guided <i>de novo</i> modelling<br>not modelled<br>COOT, density guided <i>de novo</i> modelling<br>not modelled<br>COOT, density guided <i>de novo</i> modelling<br>not modelled | UCSF Chimera, COOT, density + model guided building<br>UCSF Chimera, COOT, density + model guided building             |
| DNA / J            | Upstream DNA  | 125-183       |                                                                                                                                                                                                                                                                                                                                                                                                                                                                     |                                                                                                                        |
| Sfh1 / K           | N-term.       | 1-150         |                                                                                                                                                                                                                                                                                                                                                                                                                                                                     |                                                                                                                        |
| Sfh1 / K           | RPT1          | 151-186       |                                                                                                                                                                                                                                                                                                                                                                                                                                                                     |                                                                                                                        |
| Sfh1 / K           |               | 187-198       |                                                                                                                                                                                                                                                                                                                                                                                                                                                                     |                                                                                                                        |
| Sfh1 / K           | RPT2          | 198-201       |                                                                                                                                                                                                                                                                                                                                                                                                                                                                     |                                                                                                                        |
| Sfh1 / K           |               | 202-267       |                                                                                                                                                                                                                                                                                                                                                                                                                                                                     |                                                                                                                        |
| Sfh1 / K           | Poly-alanine  | 268-274       |                                                                                                                                                                                                                                                                                                                                                                                                                                                                     |                                                                                                                        |
| Sfh1 / K           |               | 275-341       |                                                                                                                                                                                                                                                                                                                                                                                                                                                                     |                                                                                                                        |
| Sfh1 / K           | Docking helix | 342-346       |                                                                                                                                                                                                                                                                                                                                                                                                                                                                     |                                                                                                                        |
| Sfh1 / K           |               | 347-360       |                                                                                                                                                                                                                                                                                                                                                                                                                                                                     |                                                                                                                        |
| Sfh1 / K           | C-term.       | 361-372       |                                                                                                                                                                                                                                                                                                                                                                                                                                                                     |                                                                                                                        |
| Sfh1 / K           |               | 373-408       |                                                                                                                                                                                                                                                                                                                                                                                                                                                                     |                                                                                                                        |
| Sfh1 / K           |               | 408-426       |                                                                                                                                                                                                                                                                                                                                                                                                                                                                     |                                                                                                                        |
| Rsc8 / L           | N-term.       | 1-58          | not modelled<br>COOT, density guided <i>de novo</i> modelling<br>2FQ3 / SWISS<br>COOT, density guided <i>de novo</i> modelling                                                                                                                                                                                                                                                                                                                                      | UCSF Chimera, COOT, density + model guided building                                                                    |
| Rsc8 / L           | SWIRM         | 59-86         |                                                                                                                                                                                                                                                                                                                                                                                                                                                                     |                                                                                                                        |
| Rsc8 / L           |               | 87-169        |                                                                                                                                                                                                                                                                                                                                                                                                                                                                     |                                                                                                                        |
| Rsc8 / L           |               | 170-200       |                                                                                                                                                                                                                                                                                                                                                                                                                                                                     |                                                                                                                        |

|          |            |           |                                                  |                                                     |
|----------|------------|-----------|--------------------------------------------------|-----------------------------------------------------|
| Rsc8 / L |            | 201-254   | not modelled                                     |                                                     |
| Rsc8 / L | Zn finger  | 255-307   | 1TOT / SWISS                                     | UCSF Chimera, COOT, density + model guided building |
| Rsc8 / L |            | 308-314   | not modelled                                     |                                                     |
| Rsc8 / L | SANT       | 315-359   | 2YUS / SWISS                                     | UCSF Chimera, COOT, density + model guided building |
| Rsc8 / L |            | 360-368   | COOT, density guided<br><i>de novo</i> modelling |                                                     |
| Rsc8 / L |            | 369-385   | not modelled                                     |                                                     |
| Rsc8 / L | Long helix | 386-492   | COOT, density guided<br><i>de novo</i> modelling |                                                     |
| Rsc8 / L | C-term.    | 493-557   | not modelled                                     |                                                     |
| Rsc8 / L | N-term.    | 1001-1081 | not modelled                                     |                                                     |
| Rsc8 / L |            | 1082-1086 | COOT, density guided<br><i>de novo</i> modelling |                                                     |
| Rsc8 / L | SWIRM      | 1087-1169 | 2FQ3 / SWISS                                     | UCSF Chimera, COOT, density + model guided building |
| Rsc8 / L |            | 1170-1202 | COOT, density guided<br><i>de novo</i> modelling |                                                     |
| Rsc8 / L | Zn finger  | 1203-1310 | not modelled                                     |                                                     |
| Rsc8 / L |            | 1311-1314 | COOT, density guided<br><i>de novo</i> modelling |                                                     |
| Rsc8 / L | SANT       | 1315-1359 | 2YUS / SWISS                                     | UCSF Chimera, COOT, density + model guided building |
| Rsc8 / L |            | 1360-1370 | COOT, density guided<br><i>de novo</i> modelling |                                                     |
| Rsc8 / L |            | 1371-1419 | not modelled                                     |                                                     |
| Rsc8 / L | Long helix | 1420-1499 | COOT, density guided<br><i>de novo</i> modelling |                                                     |
| Rsc8 / L | C-term.    | 1500-1557 | not modelled                                     |                                                     |
| <hr/>    |            |           |                                                  |                                                     |
| Npl6 / M | N-term.    | 1-322     | not modelled                                     |                                                     |
| Npl6 / M |            | 323-434   | COOT, density guided<br><i>de novo</i> modelling |                                                     |
| Npl6 / M | C-term.    | 435       | not modelled                                     |                                                     |
| <hr/>    |            |           |                                                  |                                                     |
| Rsc9 / N | N-term.    | 1-55      | not modelled                                     |                                                     |
| Rsc9 / N |            | 56-80     | COOT, density guided<br><i>de novo</i> modelling |                                                     |
| Rsc9 / N | Armadillo  | 81-161    | COOT, density guided<br><i>de novo</i> modelling |                                                     |
| Rsc9 / N | Armadillo  | 160-319   | 4V3Q / SWISS                                     | UCSF Chimera, COOT, density + model guided building |
| Rsc9 / N | Armadillo  | 320-346   | COOT, density guided<br><i>de novo</i> modelling |                                                     |

|           |           |         |                                                  |                                                        |
|-----------|-----------|---------|--------------------------------------------------|--------------------------------------------------------|
| Rsc9 / N  |           | 347-359 | COOT, density guided<br><i>de novo</i> modelling |                                                        |
| Rsc9 / N  | Zn finger | 360-516 | not modelled                                     |                                                        |
| Rsc9 / N  |           | 517-524 | COOT, density guided<br><i>de novo</i> modelling |                                                        |
| Rsc9 / N  | Armadillo | 525-578 | COOT, density guided<br><i>de novo</i> modelling |                                                        |
| Rsc9 / N  | C-term.   | 579-581 | not modelled                                     |                                                        |
| Rsc6 / O  | N-term.   | 1-5     | not modelled                                     |                                                        |
| Rsc6 / O  |           | 6-61    | COOT, density guided<br><i>de novo</i> modelling |                                                        |
| Rsc6 / O  |           | 62-227  | not modelled                                     |                                                        |
| Rsc6 / O  | SWIB      | 228-269 | 1UHR / SWISS                                     | UCSF Chimera, COOT, density<br>+ model guided building |
| Rsc6 / O  |           | 270-312 | not modelled                                     |                                                        |
| Rsc6 / O  | SWIB      | 313-343 | 1UHR / SWISS                                     | UCSF Chimera, COOT, density<br>+ model guided building |
| Rsc6 / O  |           | 344-391 | not modelled                                     |                                                        |
| Rsc6 / O  |           | 392-480 | COOT, density guided<br><i>de novo</i> modelling |                                                        |
| Rsc6 / O  | C-term.   | 481-483 | not modelled                                     |                                                        |
| Rsc58 / P | N-term.   | 1-9     | not modelled                                     |                                                        |
| Rsc58 / P | Bromo     | 10-36   | COOT, density guided<br><i>de novo</i> modelling |                                                        |
| Rsc58 / P | Bromo     | 37-71   | not modelled                                     |                                                        |
| Rsc58 / P | Bromo     | 72-121  | 3LJW / SWISS                                     | UCSF Chimera, COOT, density<br>+ model guided building |
| Rsc58 / P | Bromo     | 122-139 | COOT, density guided<br><i>de novo</i> modelling |                                                        |
| Rsc58 / P |           | 140-167 | not modelled                                     |                                                        |
| Rsc58 / P |           | 168-316 | COOT, density guided<br><i>de novo</i> modelling |                                                        |
| Rsc58 / P |           | 317-387 | not modelled                                     |                                                        |
| Rsc58 / P |           | 388-491 | COOT, density guided<br><i>de novo</i> modelling |                                                        |
| Rsc58 / P | C-term.   | 492-502 | not modelled                                     |                                                        |
| Htl1 / Q  | N-term.   | 1-16    | not modelled                                     |                                                        |
| Htl1 / Q  |           | 17-74   | COOT, density guided<br><i>de novo</i> modelling |                                                        |
| Htl1 / Q  | C-term.   | 75-78   | not modelled                                     |                                                        |



|            |                        |                                                              |                                                  |                                                                                                   |
|------------|------------------------|--------------------------------------------------------------|--------------------------------------------------|---------------------------------------------------------------------------------------------------|
| Rsc4 / R   | N-term. / Tandem bromo | 1-443                                                        | not modelled                                     |                                                                                                   |
| Rsc4 / R   | Sheet bundle 1         | 444-536                                                      | COOT, density guided<br><i>de novo</i> modelling |                                                                                                   |
| Rsc4 / R   |                        | 537-587                                                      | not modelled                                     |                                                                                                   |
| Rsc4 / R   | Sheet bundle 2         | 588-625                                                      | COOT, density guided<br><i>de novo</i> modelling |                                                                                                   |
| Sth1 / S   | N-term.                | 1-47                                                         | not modelled                                     |                                                                                                   |
| Sth1 / S   |                        | 48-134                                                       | COOT, density guided<br><i>de novo</i> modelling |                                                                                                   |
| Sth1 / S   |                        | 135-156                                                      | not modelled                                     |                                                                                                   |
| Sth1 / S   |                        | 157-293                                                      | COOT, density guided<br><i>de novo</i> modelling |                                                                                                   |
| Sth1 / S   |                        | 294-321                                                      | not modelled                                     | UCSF Chimera, rigid-body docking together with ARP module                                         |
| Sth1 / S   | HSA                    | 322-369                                                      | 4I6M:C /<br>Used as deposited                    | Removed residues (see residue range)<br><br>Amino acid residues mutated to Sth1-HSA (see Methods) |
| Sth1 / S   |                        | 370-392                                                      | not modelled                                     |                                                                                                   |
|            |                        | modelled:<br>393-407<br>447-662,<br>677-734,<br>754-940,     |                                                  | UCSF Chimera,<br>PHENIX real space refinement                                                     |
| Sth1 / S   | ATPase                 | 976-1006                                                     | 5Z3U:O / Rosetta                                 | Side chains stubbed                                                                               |
|            |                        | not modelled:<br>408-446,<br>663-676,<br>735-753,<br>941-975 |                                                  | Removed residues (see residue range)                                                              |
| Sth1 / S   | Bromo,<br>C-term.      | 1007-1359                                                    | not modelled                                     |                                                                                                   |
| Arp7 / T   |                        |                                                              |                                                  |                                                                                                   |
| Arp9 / U   | ARP module             | Same as in PDB entry                                         | 4I6M / Used as deposited                         | UCSF Chimera, rigid-body docking                                                                  |
| Rtt102 / V |                        |                                                              |                                                  |                                                                                                   |
| Chain X    | poly-alanine           |                                                              | COOT, density guided<br><i>de novo</i> modelling |                                                                                                   |

**Extended Data Table 3 | Cryo-EM data collection, refinement and validation statistics.**

|                                                  | Sth1-nucleosome structure<br>(map 7)<br>(EMDB-xxxx)<br>(PDB xxxx) | RSC core structure<br>(map 8)<br>(EMDB-xxxx)<br>(PDB xxxx) |
|--------------------------------------------------|-------------------------------------------------------------------|------------------------------------------------------------|
| <b>Data collection and processing</b>            |                                                                   |                                                            |
| Magnification                                    | 130,000                                                           | 130,000                                                    |
| Voltage (kV)                                     | 300                                                               | 300                                                        |
| Electron exposure (e-/Å <sup>2</sup> )           | 47.8 / 45.4*                                                      | 39.0 <sup>†</sup> / 45.02 <sup>†</sup> / 54.9 <sup>‡</sup> |
| Defocus range (µm)                               | 0.4 – 2.9                                                         | 0.8 – 4.8                                                  |
| Pixel size (Å)                                   | 1.05                                                              | 1.05                                                       |
| Symmetry imposed                                 | C1                                                                | C1                                                         |
| Initial particle images (no.)                    | 1,232,532                                                         | 1,009,020                                                  |
| Final particle images (no.)                      | 106,474 / 35,972                                                  | 176,594                                                    |
| Map resolution (Å)                               | 3.9                                                               | 3.6                                                        |
| FSC threshold                                    | 0.143                                                             | 0.143                                                      |
| Map resolution range (Å)                         | 3.5 – 7.5                                                         | 3.5 – 5.5                                                  |
| <b>Refinement</b>                                |                                                                   |                                                            |
| Initial model used (PDB code)                    | 5Z3U                                                              | 3LJW, 1UHR, 2FQ3,<br>2YUS, 1TOT, 4V3Q,<br>6AX5             |
| Model resolution (Å)                             | 3.63                                                              | 3.76                                                       |
| FSC threshold                                    | 0.5                                                               | 0.5                                                        |
| Map sharpening <i>B</i> factor (Å <sup>2</sup> ) | -150                                                              | -105.7                                                     |
| Model composition                                |                                                                   |                                                            |
| Non-hydrogen atoms                               | 13,655                                                            | 20,545                                                     |
| Protein / Nucleotide residues                    | 1,274 / 246                                                       | 2,678 / -                                                  |
| Ligands                                          | 0                                                                 | 1x Zn                                                      |
| <i>B</i> factors (Å <sup>2</sup> )               |                                                                   |                                                            |
| Protein                                          | 106.53                                                            | 53.27                                                      |
| Ligand                                           |                                                                   | 30.00                                                      |
| Nucleotide                                       | 119.35                                                            |                                                            |
| R.m.s. deviations                                |                                                                   |                                                            |
| Bond lengths (Å)                                 | 0.004                                                             | 0.004                                                      |
| Bond angles (°)                                  | 0.748                                                             | 0.931                                                      |
| Validation                                       |                                                                   |                                                            |
| MolProbity score                                 | 1.19                                                              | 1.57                                                       |
| Clashscore                                       | 4.07                                                              | 4.30                                                       |
| Poor rotamers (%)                                | 0.00                                                              | 0.14                                                       |
| Ramachandran plot                                |                                                                   |                                                            |
| Favored (%)                                      | 98.07                                                             | 94.84                                                      |
| Allowed (%)                                      | 1.93                                                              | 5.16                                                       |
| Disallowed (%)                                   | 0.00                                                              | 0.00                                                       |

\* Dataset from two collections were combined

Datasets from three collections were combined, <sup>†</sup> not tilted, <sup>‡</sup> 25° tilt
